# Supplementary material for: Femtosecond laser microdissection isolating regenerating C. elegans neurons for single cell RNA sequencing
Source: Research Square preprint supplement (doi:10.21203/rs.3.rs-138506/v1), 2021-01-18
Supplement: Supplementary file 1 [file 629089c806f36ab65f88b500.xlsx]

## Sheet: fs-LM_Supplementary_Table_1
Gene name	Reference
prde-1	Kim, K.W. et al. A Neuronal piRNA Pathway Inhibits Axon Regeneration in C.elegans. Neuron 97, 511-519.e516 (2018).
tofu-3
tofu-5
prg-1
tofu-7
ekl-1
drh-3
ego-1
hpl-2
adt-1	Kim, K.W. et al. Expanded genetic screening in Caenorhabditis elegans identifies new regulators and an inhibitory role for NAD(+) in axon regeneration. Elife 7, e39756 (2018).
adt-3
C05D9.7
dpy-10
F35G2.1
gly-2
osm-11
zig-1
zig-3
abts-1
mfsd-6
fli-1
mec-12
mec-17
tba-9
vab-10
plk-1
svh-2
cept-2
cpr-1
dhhc-11
eat-3
npr-20
ptps-1
supr-1
jph-1
rab-8
rsef-1
osm-7
par-2
rgl-1
wdfy-3
wdr-23
brap-2
cdc-48.1
ced-9
dnj-23
fbxc-50
math-33
skr-5
tep-1
mec-8
rict-1
rtcb-1
skn-1
smg-3
syd-9
tdp-1
wdr-5.1
emb-9
epi-1
mig-17
ZC116.3
lgc-12
tmc-1
ivns-1
twf-2
nud-1
tba-7
nmat-2
qns-1
mgl-1
mgl-3
npr-25
ucr-2.3
nex-1
nex-2
drag-1
ect-2
lin-2
magi-1
prmt-5
rap-1
smz-1
trxr-1
natb-1
rnf-5
ulp-5
csr-1
hda-6
elpc-3
alg-1	Chen, L. et al. Axon regeneration pathways identified by systematic genetic screening in C. elegans. Neuron 71, 1043-1057 (2011).
ccpp-1
cha-1
cnx-1
cwn-2
dab-1
dgk-1
dop-3
dpy-22
ebp-1
egl-27
hrp-1
hum-4
isp-1
jip-1
jun-1
kap-1
klp-11
lin-39
max-2
nduf-2.2
alg-2
brd-1
cam-1
cdc-7
cdh-8
cec-1
cex-1
cids-1
cpna-4
cul-5
daf-3
ddr-1
ddr-2
dpy-19
egl-20
egl-30
egl-5
fax-1
frm-8
gar-2
gcn-2
nfi-1
hif-1
ngn-1
hop-1
nkb-1
npp-12
hst-2
pig-1
kin-20
pptr-1
lin-10
ptp-3
mab-20
rhy-1
msi-1
ric-3
nhr-111
rig-3
nurf-1
rip-1
sax-7
pax-2
sdn-1
pdf-1
sma-1
pkc-1
sma-4
pqn-55
sphk-1
psa-1
strd-1
rabs-5
syd-2
rig-4
tab-1
rpy-1
tag-68
sbt-1
tph-1
sec-22
uev-1
snt-1
uev-3
srp-7
unc-1
sul-1
unc-104
tag-312
unc-115
unc-14
unc-24
unc-17
unc-64
unc-25
unc-70
unc-26
unc-76
unc-32
unc-8
unc-34
unc-80
unc-41
unc-86
unc-44
usp-46
unc-51
zip-4
unc-53
unc-57
unc-69
unc-73
unc-75
xnp-1
xpo-3
zip-5
K10G9.1
F09G2.1
Y106G6H.14
ZK418.9
parg-1	Byrne, A.B. et al. Inhibiting poly(ADP-ribosylation) improves axon regeneration. Elife 5, e12734 (2016).
parg-2
atfs-1	Nix, P. et al. Axon regeneration genes identified by RNAi screening in C. elegans. J Neurosci 34, 629-645 (2014).
cdka-1
daf-2
hst-3.1
unc-130
let-60
tax-6
lin-42
cyy-1
par-1
glp-1
ceh-13
aph-1
F10G8.6
coh-1
lim-9
max-1
T06D8.3
Y57G11C.33
rad-26
nlg-1
unc-71
kal-1
hsf-1
mpk-1
ric-4
snt-5
unc-116
aak-2
daf-16
mtm-6
mtm-9
psr-1
stau-1
unc-33
unc-129
bcc-1
dlk-1
F16A11.2
fos-1
gsk-3
ire-1
jnk-1
kgb-2
klf-1
mlk-1
mtm-1
smn-1
wts-1
zbp-1
cst-1
cst-2
sek-6
mkk-4
mek-1
pmk-3
kgb-1
vhp-1
lip-1
ZK757.2
F28C6.8
unc-16
cebp-1
egl-19	Other sources
itr-1
acy-1
unc-68
ced-3
ced-4
crt-1
ets-4
rpm-1
mak-2
gsa-1
gpa-12
rhgf-1
rho-1
ser-7
svh-1
faah-1
goa-1
egl-8
tpa-1
pxn-2
daf-18
lin-12
sup-17
sel-12
rsks-1
vab-1
sax-3
unc-6
slt-1
mig-10
ced-10
efa-6
tac-1
zyg-8
klp-7
ttll-5
mec-7
ccpp-6
ptrn-1
let-7
lin-41
lin-29
ced-1
ced-6
ced-7
pde-4
kin-2
rga-5
xbp-1
ima-3
