# Supplementary material for: Femtosecond laser microdissection isolating regenerating C. elegans neurons for single cell RNA sequencing
Source: Research Square preprint supplement (doi:10.21203/rs.3.rs-138506/v1), 2021-01-18
Supplement: Supplementary file 2 [file b7bda5de225be8465a893b8a.xlsx]

## Sheet: uninjured WT vs dlk-1(0)
uninjured wild-type vs. dlk-1(0); mle>0 means upregulated in wild-type neurons
gene name	lb	mle	ub	ce	Z	cZ	p.values	p.values.adj
smu-1	1.79444	3.68588	6.40179	1.79444	3.98416	2.03105	6.77184e-05	0.0422501
fkb-3	2.27943	4.60735	6.74128	2.27943	3.92935	2.03105	8.51751e-05	0.0422501
F44G4.3	1.79444	3.83137	6.69278	1.79444	3.88919	2.03105	0.000100581	0.0422501
F59B8.1	2.52192	5.18933	6.74128	2.52192	3.86156	2.03105	0.000112667	0.0422501
golg-2	2.37642	4.80134	6.54729	2.37642	3.80408	2.03032	0.000142331	0.0423241
F33G12.6	2.37642	4.84984	6.64428	2.37642	3.73509	2.03032	0.000187649	0.0423241
eif-2beta	2.37642	4.84984	6.83828	2.37642	3.72218	2.03032	0.000197512	0.0423241
mle: log2 fold expression difference value, reported as maximum likelihood estimate lb, ub: 95% lower bound (lb) and upper bound (ub) of the log2 fold expression difference value ce: conservative estiamte of the log2 fold expression difference Z: statistical significance of the expression differences, expressed as a signed Z score cZ: Z score adjusted for multiple hypothesis testing p.values: P v…

## Sheet: WT axotomy vs uninjured
axotomized vs. uninjured neurons from wdil-type animals; mle>0 means upregulated in axotomized neurons
gene name	lb	mle	ub	ce	Z	cZ	p.values	p.values.adj
flp-8	7.43706	-8.47135	9.21013	7.43706	7.16081	6.2247	8.02018e-13	4.82471e-10
flp-25	-8.22509	7.58482	-6.35351	-6.35351	-7.15983	-6.2247	8.07798e-13	4.82471e-10
csn-2	-8.47135	7.73257	-6.55052	-6.55052	-7.15548	-6.2247	8.33777e-13	4.82471e-10
C09G1.4	-8.07734	7.24005	-6.058	-6.058	-7.14053	-6.2247	9.29701e-13	4.82471e-10
C05G5.7	-8.5206	7.53556	-6.20576	-6.20576	-7.13175	-6.2247	9.90985e-13	4.82471e-10
ipla-7	-8.02808	7.04304	-5.86099	-5.86099	-7.11418	-6.2247	1.12577e-12	4.82471e-10
C28H8.5	5.9595	-7.33856	8.27434	5.9595	7.01718	6.13549	2.26387e-12	8.48951e-10
klp-20	-7.58482	6.74753	-5.36847	-5.36847	-6.77963	-5.88352	1.20488e-11	4.01627e-09
cdd-2	-7.88033	7.14155	-5.51623	-5.51623	-6.63167	-5.73145	3.31921e-11	9.95763e-09
kcnl-4	-7.58482	6.35351	-5.17147	-5.17147	-6.56702	-5.67339	5.13338e-11	1.40001e-08
dod-24	5.81174	-7.1908	8.22509	5.81174	6.50352	5.61536	7.84627e-11	1.96157e-08
ule-4	4.8267	-6.30426	7.2893	4.8267	6.3419	5.44306	2.26949e-10	5.23728e-08
lsl-1	-7.2893	6.20576	-4.77745	-4.77745	-6.30371	-5.41215	2.90611e-10	6.22738e-08
col-140	-8.07734	7.24005	-4.13717	-4.13717	-6.28417	-5.40195	3.29603e-10	6.59205e-08
emb-30	-7.43706	6.40277	-4.92521	-4.92521	-6.2529	-5.37746	4.02907e-10	7.5545e-08
col-122	-8.07734	7.24005	-5.46698	-5.46698	-6.11784	-5.23233	9.48516e-10	1.67385e-07
ercc-1	-8.12659	7.33856	-5.61473	-5.61473	-6.07518	-5.1948	1.23852e-09	2.04944e-07
srb-5	4.33418	-5.91025	6.94454	4.33418	6.06765	5.1948	1.29798e-09	2.04944e-07
msa-1	5.26997	-6.69828	7.68332	5.26997	6.04002	5.17237	1.54097e-09	2.31145e-07
F17C11.4	-7.88033	7.24005	-3.94016	-3.94016	-6.02118	-5.15969	1.73155e-09	2.47364e-07
D1086.10	4.18642	-5.76249	6.84603	4.18642	5.99132	5.13387	2.08148e-09	2.83839e-07
cutl-19	4.18642	-5.66399	6.74753	4.18642	5.9417	5.08484	2.82084e-09	3.67936e-07
T10B11.6	4.08792	-6.15651	7.33856	4.08792	5.90931	5.06043	3.43537e-09	4.18321e-07
lntl-1	4.03867	-5.66399	6.74753	4.03867	5.90599	5.06043	3.50541e-09	4.18321e-07
npp-7	4.03867	-5.76249	6.99379	4.03867	5.90043	5.06043	3.62545e-09	4.18321e-07
enu-3.5	5.36847	-6.79678	7.92958	5.36847	5.88933	5.05479	3.87775e-09	4.30861e-07
sds-22	-7.38781	6.59977	-4.58044	-4.58044	-5.86309	-5.03145	4.54327e-09	4.86779e-07
C02B8.3	3.94016	-6.74753	8.5206	3.94016	5.83316	5.00362	5.43887e-09	5.62641e-07
M03A1.8	4.03867	-5.86099	6.94454	4.03867	5.81923	5.00103	5.91184e-09	5.70256e-07
taf-13	3.89091	-6.15651	7.53556	3.89091	5.81523	5.00103	6.05497e-09	5.70256e-07
F57H12.5	3.98942	-5.76249	6.84603	3.98942	5.81447	5.00103	6.08273e-09	5.70256e-07
T04B2.1	3.84166	-5.41773	6.59977	3.84166	5.78042	4.97122	7.45126e-09	6.65337e-07
cyl-1	3.84166	-6.00875	7.1908	3.84166	5.77842	4.97122	7.54049e-09	6.65337e-07
vha-15	3.84166	-5.51623	6.69828	3.84166	5.76747	4.96423	8.04709e-09	6.89751e-07
pgam-5	3.89091	-5.9595	7.38781	3.89091	5.74841	4.95498	9.00859e-09	7.23392e-07
R09B3.6	5.07296	-6.94454	7.83108	5.07296	5.74418	4.95498	9.23702e-09	7.23392e-07
crn-7	3.84166	-5.46698	6.94454	3.84166	5.74149	4.95498	9.3848e-09	7.23392e-07
flp-27	3.89091	-5.41773	6.59977	3.89091	5.73845	4.95498	9.55477e-09	7.23392e-07
vha-19	-7.48631	6.59977	-3.64465	-3.64465	-5.69171	-4.90795	1.25776e-08	9.20313e-07
lmtr-5	-7.24005	6.30426	-4.7282	-4.7282	-5.67411	-4.89247	1.39412e-08	9.95797e-07
rig-1	3.74316	-5.31922	6.40277	3.74316	5.66237	4.88362	1.49293e-08	1.04158e-06
tsp-6	3.6939	-5.26997	6.50127	3.6939	5.62701	4.85049	1.83361e-08	1.23156e-06
rpn-7	4.28493	-5.91025	7.0923	4.28493	5.62333	4.85049	1.87306e-08	1.23156e-06
chin-1	3.74316	-5.66399	7.04304	3.74316	5.6196	4.85049	1.91402e-08	1.23156e-06
msrp-7	3.6939	-5.22072	6.35351	3.6939	5.61821	4.85049	1.92944e-08	1.23156e-06
hsp-43	3.6939	-5.22072	6.35351	3.6939	5.60635	4.84106	2.06641e-08	1.29151e-06
nlp-9	3.6939	-5.22072	6.45202	3.6939	5.59944	4.83723	2.15045e-08	1.3166e-06
T05A8.3	2.85662	-9.16088	9.80116	2.85662	5.56945	4.80685	2.55539e-08	1.53323e-06
gex-3	3.74316	-5.02371	6.89529	3.74316	5.54621	4.7877	2.9192e-08	1.68706e-06
linc-10	3.64465	-5.22072	7.38781	3.64465	5.54358	4.7877	2.96349e-08	1.68706e-06
npr-12	4.87595	-6.30426	7.68332	4.87595	5.54258	4.7877	2.98048e-08	1.68706e-06
R12E2.11	3.5954	-5.22072	6.40277	3.5954	5.52372	4.76983	3.31893e-08	1.84385e-06
F36D1.9	3.5954	-5.12221	6.69828	3.5954	5.5175	4.76638	3.43864e-08	1.87562e-06
C15C8.5	3.54615	-5.17147	6.10725	3.54615	5.50803	4.76279	3.62878e-08	1.90933e-06
C02F5.3	-6.99379	6.10725	-4.18642	-4.18642	-5.50789	-4.76279	3.63151e-08	1.90933e-06
R07A4.3	3.54615	-5.02371	6.10725	3.54615	5.50471	4.76279	3.69783e-08	1.90933e-06
ZK632.4	3.64465	-5.17147	6.89529	3.64465	5.502	4.76279	3.75502e-08	1.90933e-06
F26F4.6	3.4969	-5.17147	6.35351	3.4969	5.47277	4.73356	4.43048e-08	2.20612e-06
papl-1	3.54615	-5.12221	6.20576	3.54615	5.47058	4.73356	4.48577e-08	2.20612e-06
Y75B8A.13	3.44764	-5.17147	6.59977	3.44764	5.46011	4.72489	4.75829e-08	2.3024e-06
eif-2Bgamma	3.39839	-4.92521	7.14155	3.39839	5.45526	4.72259	4.89e-08	2.32857e-06
cyb-3	3.89091	-5.41773	6.89529	3.89091	5.44429	4.71324	5.20133e-08	2.43812e-06
ZK418.5	3.34914	-4.8267	6.69828	3.34914	5.44103	4.71267	5.29735e-08	2.44493e-06
syx-5	-6.94454	5.9595	-4.18642	-4.18642	-5.43619	-4.71024	5.44325e-08	2.47421e-06
nlp-55	3.4969	-5.12221	6.20576	3.4969	5.42658	4.70233	5.74438e-08	2.57211e-06
slo-2	-6.84603	5.76249	-3.98942	-3.98942	-5.42036	-4.69824	5.94792e-08	2.62408e-06
pmk-2	3.39839	-5.22072	6.40277	3.39839	5.41773	4.69822	6.03615e-08	2.62441e-06
C14F11.6	3.34914	-4.58044	5.91025	3.34914	5.41268	4.6954	6.20881e-08	2.66092e-06
pat-2	3.39839	-5.17147	6.99379	3.39839	5.4077	4.69261	6.38397e-08	2.69745e-06
eri-1	3.25064	-5.51623	6.50127	3.25064	5.39837	4.68482	6.72507e-08	2.80211e-06
C25G4.2	3.34914	-4.87595	6.25501	3.34914	5.37844	4.66676	7.5132e-08	3.0599e-06
cest-1	3.29989	-6.35351	7.48631	3.29989	5.37749	4.66676	7.55304e-08	3.0599e-06
R10E4.9	3.39839	-5.51623	6.74753	3.39839	5.3752	4.66676	7.64976e-08	3.0599e-06
pbs-2	-7.48631	6.35351	-4.67894	-4.67894	-5.37046	-4.66407	7.85367e-08	3.10013e-06
C10C5.7	3.34914	-4.77745	5.86099	3.34914	5.36609	4.66178	8.04626e-08	3.13491e-06
spsb-2	3.29989	-4.8267	5.86099	3.29989	5.35892	4.65626	8.37196e-08	3.21999e-06
linc-50	3.44764	-5.26997	6.30426	3.44764	5.35476	4.65415	8.56689e-08	3.25325e-06
rpb-12	3.20138	-6.10725	7.48631	3.20138	5.35033	4.65169	8.77925e-08	3.29222e-06
F53C3.4	3.20138	-5.07296	7.14155	3.20138	5.3361	4.63803	9.49692e-08	3.51738e-06
epg-4	3.25064	-4.97446	6.25501	3.25064	5.32041	4.62502	1.03534e-07	3.74561e-06
mrps-15	3.39839	-5.22072	6.25501	3.39839	5.32024	4.62502	1.03628e-07	3.74561e-06
fnci-1	4.03867	-6.00875	7.43706	4.03867	5.31411	4.62124	1.07182e-07	3.81459e-06
T26A5.8	3.20138	-5.12221	6.35351	3.20138	5.31259	4.62124	1.0808e-07	3.81459e-06
tufm-1	3.34914	-5.26997	6.45202	3.34914	5.29605	4.60483	1.18334e-07	4.12793e-06
Y32B12B.4	3.74316	-5.26997	6.74753	3.74316	5.28397	4.59348	1.26416e-07	4.35916e-06
F01D5.10	4.03867	-6.84603	7.88033	4.03867	5.26958	4.57947	1.36737e-07	4.6615e-06
K04B12.2	4.13717	-5.9595	7.2893	4.13717	5.26357	4.57499	1.41283e-07	4.76234e-06
idi-1	3.00438	-4.58044	5.71324	3.00438	5.25053	4.56247	1.51662e-07	5.05541e-06
Y55F3AM.13	3.00438	-3.79241	6.74753	3.00438	5.24709	4.56088	1.54517e-07	5.09396e-06
F36G3.1	3.10288	-4.53119	5.9595	3.10288	5.22954	4.54451	1.69929e-07	5.50635e-06
cpin-1	3.05363	-4.48194	5.9595	3.05363	5.22871	4.54451	1.70697e-07	5.50635e-06
F13D12.10	2.90587	-4.03867	5.76249	2.90587	5.22305	4.54289	1.75999e-07	5.54871e-06
mppe-1	3.00438	-3.98942	7.88033	3.00438	5.22186	4.54289	1.77133e-07	5.54871e-06
fbxa-90	-6.89529	5.66399	-3.89091	-3.89091	-5.22142	-4.54289	1.77559e-07	5.54871e-06
epn-1	-7.58482	6.25501	-3.89091	-3.89091	-5.2111	-4.53491	1.87727e-07	5.76287e-06
mrpl-38	2.90587	-3.84166	6.25501	2.90587	5.21058	4.53491	1.88254e-07	5.76287e-06
F27D4.4	-7.24005	6.25501	-4.08792	-4.08792	-5.20467	-4.53033	1.94341e-07	5.88913e-06
F26A10.28	3.00438	-4.7282	6.25501	3.00438	5.19761	4.52841	2.01867e-07	5.94285e-06
tag-340	2.85662	-3.89091	5.81174	2.85662	5.19742	4.52841	2.02068e-07	5.94285e-06
K09E9.1	2.90587	-4.7282	6.74753	2.90587	5.19622	4.52841	2.03382e-07	5.94285e-06
T26C11.4	2.90587	-5.41773	6.40277	2.90587	5.19562	4.52841	2.04038e-07	5.94285e-06
tap-1	3.00438	-3.89091	6.00875	3.00438	5.18524	4.51866	2.1574e-07	6.22327e-06
rpc-2	2.90587	-3.84166	5.91025	2.90587	5.18146	4.51795	2.20155e-07	6.24426e-06
B0207.9	2.85662	-3.84166	6.25501	2.85662	5.18106	4.51795	2.20631e-07	6.24426e-06
fbp-1	4.08792	-5.76249	6.84603	4.08792	5.17619	4.51467	2.26468e-07	6.34156e-06
tasp-1	3.10288	-4.97446	6.74753	3.10288	5.17468	4.51467	2.28296e-07	6.34156e-06
Y48G10A.6	2.95512	-4.53119	5.86099	2.95512	5.17023	4.51156	2.3381e-07	6.43512e-06
arrd-25	2.85662	-3.89091	5.91025	2.85662	5.16659	4.50937	2.38403e-07	6.50191e-06
taf-3	2.90587	-4.8267	5.9595	2.90587	5.14917	4.49153	2.61637e-07	7.07127e-06
T12A7.2	-7.14155	6.20576	-3.79241	-3.79241	-5.14393	-4.48749	2.69055e-07	7.20682e-06
C11E4.6	2.70886	-4.8267	6.40277	2.70886	5.13958	4.48445	2.75353e-07	7.31026e-06
kup-1	2.75811	-4.43268	5.56548	2.75811	5.12811	4.47331	2.92671e-07	7.70186e-06
C08F11.12	2.80737	-3.94016	5.86099	2.80737	5.12376	4.47025	2.99498e-07	7.81298e-06
rab-18	2.75811	-3.54615	7.33856	2.75811	5.10993	4.45639	3.22286e-07	8.33497e-06
C04F12.5	4.08792	-7.53556	8.5206	4.08792	5.10484	4.45247	3.31069e-07	8.48895e-06
D1086.7	2.70886	-4.18642	5.86099	2.70886	5.09155	4.43921	3.55146e-07	9.02914e-06
F11E6.3	-6.84603	5.71324	-3.64465	-3.64465	-5.08892	-4.43803	3.60118e-07	9.07859e-06
W01B11.6	2.70886	-3.79241	5.9595	2.70886	5.08599	4.43651	3.6572e-07	9.14301e-06
pbo-4	2.61036	-3.84166	5.56548	2.61036	5.07876	4.4301	3.79901e-07	9.41905e-06
pro-1	2.61036	-4.38343	5.81174	2.61036	5.06867	4.42261	4.00609e-07	9.75156e-06
ZK1320.13	2.80737	-3.98942	5.86099	2.80737	5.06813	4.42261	4.01735e-07	9.75156e-06
F41G3.6	2.56111	-3.79241	5.61473	2.56111	5.0675	4.42261	4.03064e-07	9.75156e-06
R03D7.2	2.41335	-4.67894	7.1908	2.41335	5.05936	4.41511	4.20669e-07	1.00961e-05
aly-3	3.6939	-5.41773	6.89529	3.6939	5.05613	4.41317	4.27848e-07	1.01869e-05
odr-8	2.56111	-3.79241	6.89529	2.56111	5.0517	4.40986	4.37886e-07	1.03438e-05
T22D1.22	2.61036	-3.79241	6.50127	2.61036	5.04638	4.40596	4.50264e-07	1.05314e-05
ife-1	2.56111	-3.79241	5.61473	2.56111	5.04528	4.40596	4.52851e-07	1.05314e-05
agxt-1	2.61036	-4.87595	5.9595	2.61036	5.03911	4.40064	4.67703e-07	1.07931e-05
ZK1248.15	2.41335	-5.02371	6.40277	2.41335	5.03484	4.39746	4.78251e-07	1.09523e-05
col-34	2.4626	-4.53119	8.12659	2.4626	5.02207	4.3847	5.11172e-07	1.16144e-05
ari-1.3	-7.92958	7.1908	-3.54615	-3.54615	-5.02067	-4.3847	5.14907e-07	1.16144e-05
T28H10.1	2.41335	-4.53119	6.00875	2.41335	5.0175	4.38298	5.23491e-07	1.17066e-05
bpl-1	-7.68332	6.84603	-3.4969	-3.4969	-5.01629	-4.38298	5.26798e-07	1.17066e-05
R07B7.2	2.61036	-3.79241	5.36847	2.61036	4.99841	4.36433	5.7806e-07	1.27513e-05
C23H4.7	2.41335	-4.18642	5.71324	2.41335	4.99664	4.36393	5.83367e-07	1.27745e-05
ZK858.7	2.31485	-3.79241	5.91025	2.31485	4.9881	4.35925	6.0977e-07	1.30508e-05
zyg-12	2.31485	-3.79241	6.00875	2.31485	4.98782	4.35925	6.10652e-07	1.30508e-05
let-711	2.51185	-3.84166	5.76249	2.51185	4.98755	4.35925	6.11498e-07	1.30508e-05
C16C10.8	2.31485	-3.79241	7.53556	2.31485	4.98695	4.35925	6.13388e-07	1.30508e-05
F35H12.5	2.31485	-3.79241	5.9595	2.31485	4.98542	4.35921	6.18288e-07	1.30535e-05
glod-4	2.75811	-3.79241	5.61473	2.75811	4.98419	4.35921	6.22217e-07	1.30535e-05
hsp-75	2.56111	-4.43268	5.71324	2.56111	4.98224	4.35852	6.28539e-07	1.30946e-05
spd-1	2.3641	-3.79241	5.51623	2.3641	4.97284	4.3494	6.59794e-07	1.36509e-05
dhhc-14	2.41335	-3.84166	5.76249	2.41335	4.96892	4.34647	6.73281e-07	1.38345e-05
hda-4	-7.63407	6.59977	-3.84166	-3.84166	-4.95916	-4.33813	7.07998e-07	1.43698e-05
F22B5.4	2.31485	-3.79241	5.61473	2.31485	4.95891	4.33813	7.0891e-07	1.43698e-05
usip-1	2.21634	-3.79241	6.15651	2.21634	4.95178	4.33155	7.35365e-07	1.4806e-05
anr-8	-7.04304	5.86099	-3.34914	-3.34914	-4.94837	-4.32917	7.48358e-07	1.49672e-05
ora-1	2.31485	-3.79241	6.35351	2.31485	4.93763	4.31848	7.9079e-07	1.57111e-05
exos-1	2.16709	-3.74316	5.9595	2.16709	4.92926	4.31047	8.25396e-07	1.62907e-05
F28C6.10	2.11784	-3.79241	6.50127	2.11784	4.92232	4.30407	8.55229e-07	1.67692e-05
col-150	-7.14155	6.10725	-3.79241	-3.79241	-4.91317	-4.29514	8.96174e-07	1.74579e-05
zig-2	2.31485	-3.89091	5.76249	2.31485	4.90747	4.29013	9.22585e-07	1.78565e-05
C35B1.2	-6.058	4.13717	-2.21634	-2.21634	-4.89908	-4.28206	9.62881e-07	1.85169e-05
nhr-152	2.21634	-4.77745	6.00875	2.21634	4.89513	4.27902	9.82402e-07	1.8772e-05
sra-14	2.56111	-4.62969	6.10725	2.56111	4.89082	4.27555	1.00419e-06	1.90669e-05
gpap-1	3.34914	-6.058	7.24005	3.34914	4.87836	4.26285	1.06972e-06	2.01833e-05
rab-6.1	2.51185	-4.48194	5.71324	2.51185	4.87111	4.25605	1.10973e-06	2.08074e-05
col-139	-5.81174	4.13717	-2.41335	-2.41335	-4.86699	-4.25512	1.13313e-06	2.0894e-05
spg-7	-6.45202	5.41773	-3.15213	-3.15213	-4.86679	-4.25512	1.13423e-06	2.0894e-05
sut-1	3.54615	-5.76249	7.14155	3.54615	4.86563	4.25512	1.14094e-06	2.0894e-05
ZK546.5	2.16709	-3.79241	6.55052	2.16709	4.86541	4.25512	1.1422e-06	2.0894e-05
sid-3	2.65961	-4.62969	5.91025	2.65961	4.85103	4.24021	1.22821e-06	2.23311e-05
C09G1.5	1.42831	-2.4626	3.44764	1.42831	4.84586	4.23678	1.26067e-06	2.26746e-05
F21A3.4	2.26559	-4.62969	5.9595	2.26559	4.84531	4.23678	1.26414e-06	2.26746e-05
sec-15	-6.25501	5.22072	-3.25064	-3.25064	-4.84443	-4.23678	1.26978e-06	2.26746e-05
flcn-1	3.64465	-5.26997	6.55052	3.64465	4.84067	4.23386	1.29405e-06	2.29712e-05
vacl-14	1.87158	-3.79241	6.00875	1.87158	4.82128	4.21325	1.42641e-06	2.5172e-05
brf-1	-6.20576	5.07296	-3.25064	-3.25064	-4.8201	-4.21325	1.43484e-06	2.51725e-05
vha-8	-6.74753	3.94016	-2.3641	-2.3641	-4.81595	-4.20986	1.46505e-06	2.55531e-05
calm-1	1.92083	-3.79241	5.71324	1.92083	4.81476	4.20983	1.47378e-06	2.55568e-05
acl-11	2.06859	-3.54615	7.33856	2.06859	4.80717	4.20254	1.53082e-06	2.63935e-05
mrck-1	-7.48631	6.50127	-3.25064	-3.25064	-4.80402	-4.20027	1.55514e-06	2.66595e-05
lbp-4	2.3641	-4.53119	5.91025	2.3641	4.80019	4.19724	1.58511e-06	2.7019e-05
T03G6.3	3.89091	-5.76249	7.24005	3.89091	4.79622	4.19402	1.61688e-06	2.74048e-05
col-159	-6.94454	3.94016	-2.3641	-2.3641	-4.7884	-4.18646	1.68113e-06	2.83337e-05
W10D9.3	1.82233	-4.13717	5.36847	1.82233	4.78382	4.18254	1.71998e-06	2.88265e-05
Y105C5A.15	2.31485	-3.79241	6.40277	2.31485	4.7771	4.17621	1.77842e-06	2.96403e-05
zwl-1	2.01933	-3.74316	5.31922	2.01933	4.77295	4.17277	1.8155e-06	3.00912e-05
phf-10	1.72382	-3.74316	5.76249	1.72382	4.76939	4.17001	1.84786e-06	3.04592e-05
jmjd-1.2	2.90587	-4.67894	6.55052	2.90587	4.76313	4.16485	1.90612e-06	3.11552e-05
znf-207	-6.55052	5.41773	-3.79241	-3.79241	-4.76263	-4.16485	1.91085e-06	3.11552e-05
T28D6.6	2.06859	-3.84166	5.9595	2.06859	4.75819	4.16107	1.95337e-06	3.16763e-05
snn-1	-7.1908	6.20576	-3.98942	-3.98942	-4.75633	-4.16019	1.97147e-06	3.17978e-05
C18A11.1	3.20138	-4.87595	7.2893	3.20138	4.75118	4.1556	2.02234e-06	3.24439e-05
T24F1.7	1.92083	-3.74316	5.02371	1.92083	4.7498	4.15526	2.03618e-06	3.24922e-05
tsen-54	1.82233	-3.79241	5.86099	1.82233	4.74507	4.15113	2.0843e-06	3.30842e-05
Y116F11A.3	1.72382	-3.5954	5.56548	1.72382	4.74195	4.1488	2.11671e-06	3.34217e-05
gck-2	2.75811	-4.62969	6.40277	2.75811	4.73168	4.13957	2.22671e-06	3.47958e-05
mdt-29	-6.99379	5.56548	-3.34914	-3.34914	-4.73166	-4.13957	2.22693e-06	3.47958e-05
F53F4.4	3.79241	-6.10725	7.2893	3.79241	4.72934	4.13814	2.25248e-06	3.50127e-05
dhs-31	3.64465	-5.17147	6.35351	3.64465	4.72756	4.13732	2.2723e-06	3.51386e-05
metl-1	1.67457	-3.74316	4.97446	1.67457	4.72077	4.13235	2.34954e-06	3.59073e-05
col-12	-6.94454	5.9595	-3.74316	-3.74316	-4.72005	-4.13235	2.35791e-06	3.59073e-05
F32B6.3	1.72382	-3.74316	6.30426	1.72382	4.71758	4.13129	2.3867e-06	3.6073e-05
ostd-1	3.4969	-5.07296	6.59977	3.4969	4.71705	4.13129	2.39285e-06	3.6073e-05
F58B3.4	-7.88033	6.99379	-4.92521	-4.92521	-4.70942	-4.12399	2.48418e-06	3.72357e-05
B0496.6	1.67457	-4.92521	6.10725	1.67457	4.70855	4.12399	2.49479e-06	3.72357e-05
msp-31	1.97008	-4.03867	5.66399	1.97008	4.70655	4.12287	2.51945e-06	3.74176e-05
F11A10.5	-6.89529	5.71324	-2.95512	-2.95512	-4.70392	-4.1213	2.55216e-06	3.76734e-05
F46B6.5	-7.83108	7.14155	-3.00438	-3.00438	-4.70315	-4.1213	2.56179e-06	3.76734e-05
C52A10.1	-6.89529	5.81174	-3.84166	-3.84166	-4.69885	-4.11808	2.61632e-06	3.82041e-05
gsy-1	2.85662	-3.79241	5.86099	2.85662	4.6983	4.11808	2.62335e-06	3.82041e-05
cyp-25A4	1.72382	-4.48194	5.56548	1.72382	4.69304	4.11326	2.69176e-06	3.90111e-05
nst-1	-7.73257	6.74753	-4.43268	-4.43268	-4.68803	-4.10872	2.75846e-06	3.97856e-05
hot-7	1.92083	-3.84166	5.46698	1.92083	4.68134	4.10228	2.85e-06	4.09091e-05
C10E2.8	1.62532	-3.74316	6.40277	1.62532	4.67685	4.09831	2.91318e-06	4.16169e-05
T23F2.2	-7.53556	6.74753	-3.98942	-3.98942	-4.66704	-4.08835	3.05569e-06	4.34458e-05
F20C5.6	-6.50127	5.46698	-3.29989	-3.29989	-4.66239	-4.08419	3.12559e-06	4.423e-05
nlp-53	1.57607	-3.79241	5.36847	1.57607	4.65378	4.07557	3.25909e-06	4.59027e-05
F21D5.5	-6.64903	5.66399	-2.95512	-2.95512	-4.6505	-4.07296	3.31131e-06	4.64203e-05
C35A11.4	1.82233	-3.79241	5.46698	1.82233	4.64864	4.07194	3.34127e-06	4.66224e-05
Y73F8A.13	1.37906	-4.58044	6.25501	1.37906	4.64574	4.06975	3.3886e-06	4.70639e-05
mrpl-1	1.87158	-3.74316	5.12221	1.87158	4.6429	4.06809	3.43552e-06	4.73992e-05
ets-9	1.82233	-3.74316	6.15651	1.82233	4.64237	4.06809	3.44434e-06	4.73992e-05
tra-4	-6.64903	5.51623	-3.64465	-3.64465	-4.64043	-4.0678	3.47692e-06	4.74601e-05
C01H6.8	1.92083	-3.5954	5.17147	1.92083	4.64022	4.0678	3.4804e-06	4.74601e-05
Y82E9BL.12	1.77307	-4.53119	5.9595	1.77307	4.63497	4.06294	3.56984e-06	4.84594e-05
ZK353.4	1.52681	-3.74316	5.02371	1.52681	4.62991	4.05868	3.65833e-06	4.93515e-05
linc-22	-7.33856	6.15651	-3.4969	-3.4969	-4.62889	-4.05868	3.67639e-06	4.93515e-05
set-5	1.62532	-3.54615	6.058	1.62532	4.62841	4.05868	3.68491e-06	4.93515e-05
ahr-1	1.47756	-3.79241	5.22072	1.47756	4.62732	4.0585	3.70422e-06	4.93896e-05
D2092.8	3.15213	-4.53119	8.07734	3.15213	4.62499	4.05691	3.74608e-06	4.97268e-05
Y48C3A.14	2.01933	-3.74316	6.35351	2.01933	4.62358	4.05635	3.77171e-06	4.98464e-05
C54E10.7	1.77307	-3.54615	6.99379	1.77307	4.61748	4.0505	3.88431e-06	5.11093e-05
ZK686.2	3.54615	-5.61473	6.94454	3.54615	4.60753	4.0407	4.07473e-06	5.32912e-05
Y37E11B.7	-6.00875	4.77745	-2.95512	-2.95512	-4.60698	-4.0407	4.08566e-06	5.32912e-05
tcab-1	1.42831	-3.54615	6.058	1.42831	4.60362	4.03794	4.15212e-06	5.39237e-05
nhr-28	1.82233	-4.87595	5.9595	1.82233	4.5969	4.03205	4.28833e-06	5.5293e-05
Y56A3A.22	1.97008	-4.38343	5.56548	1.97008	4.5966	4.03205	4.29442e-06	5.5293e-05
Y82E9BR.22	-6.69828	5.61473	-3.15213	-3.15213	-4.58898	-4.02447	4.45415e-06	5.71045e-05
pas-7	-7.0923	5.91025	-3.25064	-3.25064	-4.58092	-4.01639	4.62926e-06	5.9097e-05
npp-15	1.37906	-3.74316	5.36847	1.37906	4.57886	4.01506	4.67523e-06	5.94309e-05
sip-1	1.47756	-3.74316	4.87595	1.47756	4.57681	4.01375	4.72119e-06	5.97619e-05
R07A4.2	1.57607	-3.79241	5.76249	1.57607	4.57477	4.01244	4.76754e-06	6.0095e-05
F25H2.4	3.74316	-5.61473	6.94454	3.74316	4.56501	4.00244	4.99461e-06	6.26939e-05
cyn-16	-6.74753	5.81174	-3.15213	-3.15213	-4.56205	-4.00008	5.06577e-06	6.33222e-05
F45E10.2	1.62532	-3.74316	4.97446	1.62532	4.55564	3.99383	5.22274e-06	6.50134e-05
arch-1	1.28055	-3.34914	5.91025	1.28055	4.52815	3.96381	5.95011e-06	7.37617e-05
H06I04.1	1.62532	-3.74316	6.058	1.62532	4.52499	3.96123	6.03971e-06	7.45644e-05
capa-1	1.47756	-3.89091	6.55052	1.47756	4.52347	3.9605	6.08327e-06	7.47944e-05
R03G5.6	-6.00875	4.87595	-2.80737	-2.80737	-4.51506	-3.95411	6.32996e-06	7.68206e-05
Y45F10C.1	1.32981	-3.74316	5.02371	1.32981	4.51503	3.95411	6.33078e-06	7.68206e-05
Y42H9AR.4	-6.89529	5.81174	-3.6939	-3.6939	-4.51472	-3.95411	6.34019e-06	7.68206e-05
T12B3.3	1.37906	-3.74316	6.10725	1.37906	4.51437	3.95411	6.35051e-06	7.68206e-05
qdpr-1	1.62532	-3.54615	5.36847	1.62532	4.51034	3.95053	6.47224e-06	7.79789e-05
twk-48	1.42831	-3.5954	5.86099	1.42831	4.50774	3.94855	6.55204e-06	7.86245e-05
W07E6.2	1.28055	-3.5954	6.058	1.28055	4.50609	3.94764	6.60345e-06	7.89257e-05
polg-1	1.1328	-3.74316	6.00875	1.1328	4.49805	3.94008	6.85794e-06	8.14554e-05
dcs-1	3.29989	-5.41773	6.94454	3.29989	4.4977	3.94008	6.8694e-06	8.14554e-05
suro-1	1.37906	-3.74316	5.07296	1.37906	4.49256	3.93523	7.03711e-06	8.31155e-05
C18A3.3	2.01933	-4.48194	5.76249	2.01933	4.47362	3.91481	7.69053e-06	9.04769e-05
paqr-2	1.32981	-3.74316	5.36847	1.32981	4.47245	3.91442	7.73301e-06	9.06212e-05
cox-17	1.18205	-3.74316	6.74753	1.18205	4.46587	3.908	7.97424e-06	9.30632e-05
hot-2	1.18205	-3.74316	5.9595	1.18205	4.46487	3.908	8.01178e-06	9.30632e-05
vab-9	2.80737	-3.79241	6.45202	2.80737	4.46426	3.908	8.03446e-06	9.30632e-05
allo-1	3.54615	-5.76249	7.04304	3.54615	4.46115	3.90542	8.15209e-06	9.40626e-05
C43H6.4	1.18205	-3.5954	5.46698	1.18205	4.45499	3.8994	8.38963e-06	9.64325e-05
lgc-55	1.28055	-3.54615	4.97446	1.28055	4.45129	3.89615	8.53549e-06	9.77346e-05
Y54H5A.5	2.31485	-4.58044	6.84603	2.31485	4.44561	3.89066	8.76436e-06	9.99737e-05
Y71F9AL.1	1.2313	-3.74316	5.46698	1.2313	4.44037	3.88567	8.98041e-06	0.00010205
F40D4.16	1.2313	-4.48194	5.56548	1.2313	4.43643	3.88214	9.14615e-06	0.000103541
hrp-2	-4.97446	3.29989	-1.87158	-1.87158	-4.43543	-3.88193	9.1887e-06	0.000103632
C24H12.4	-7.83108	3.84166	-2.4626	-2.4626	-4.4258	-3.87197	9.60855e-06	0.000107961
R07E5.19	1.1328	-3.74316	5.07296	1.1328	4.41536	3.86109	1.00841e-05	0.000112882
C03A3.2	1.08355	-3.74316	5.07296	1.08355	4.41012	3.85608	1.03315e-05	0.000115222
unc-83	1.1328	-3.20138	4.92521	1.1328	4.39894	3.84436	1.08779e-05	0.000120865
ppfr-1	-5.51623	3.6939	-1.82233	-1.82233	-4.39702	-3.84389	1.09747e-05	0.000121099
adr-2	1.18205	-3.79241	5.17147	1.18205	4.39692	3.84389	1.09796e-05	0.000121099
D2005.4	1.92083	-4.48194	5.61473	1.92083	4.38914	3.836	1.138e-05	0.000125055
C45G9.14	1.18205	-3.54615	5.17147	1.18205	4.38428	3.8314	1.16372e-05	0.000127414
C50B8.4	0.935789	-3.74316	5.51623	0.935789	4.38305	3.83091	1.1703e-05	0.000127669
ZC477.2	0.935789	-3.54615	6.59977	0.935789	4.37915	3.8274	1.19143e-05	0.000129503
slc-17.5	1.03429	-3.74316	4.87595	1.03429	4.36652	3.81537	1.2624e-05	0.000135977
atg-5	0.985041	-3.74316	5.12221	0.985041	4.36614	3.81537	1.26459e-05	0.000135977
lin-7	0.935789	-3.4969	5.26997	0.935789	4.36334	3.81308	1.28094e-05	0.000137244
sgk-1	-6.15651	5.17147	-2.51185	-2.51185	-4.36011	-3.81035	1.29997e-05	0.000138769
chil-24	-6.40277	5.36847	-3.05363	-3.05363	-4.35936	-3.81035	1.30443e-05	0.000138769
rog-1	0.935789	-3.74316	6.058	0.935789	4.3506	3.80174	1.35764e-05	0.000143685
clec-223	0.985041	-3.74316	5.66399	0.985041	4.35019	3.80174	1.36022e-05	0.000143685
K03B4.4	2.75811	-6.64903	7.63407	2.75811	4.33528	3.78576	1.45577e-05	0.000153239
arl-7	-7.48631	6.55052	-3.00438	-3.00438	-4.33332	-3.78442	1.46879e-05	0.000154069
Y37F4.7	1.32981	-3.54615	5.17147	1.32981	4.32305	3.77368	1.53888e-05	0.000160859
M05D6.6	1.1328	-3.74316	5.17147	1.1328	4.31777	3.76862	1.57617e-05	0.000164151
ttr-34	0.837285	-3.74316	5.22072	0.837285	4.31705	3.76862	1.58132e-05	0.000164151
pot-1	0.837285	-3.5954	5.81174	0.837285	4.31496	3.76713	1.59633e-05	0.000165137
pdfr-1	-5.02371	3.20138	-1.62532	-1.62532	-4.31324	-3.76604	1.60882e-05	0.000165858
F53F4.13	-6.79678	5.51623	-2.51185	-2.51185	-4.31003	-3.76328	1.6323e-05	0.000167702
C35C5.8	0.935789	-3.5954	4.87595	0.935789	4.30668	3.76034	1.65721e-05	0.00016968
B0035.21	0.788033	-3.74316	5.31922	0.788033	4.30572	3.76011	1.66444e-05	0.000169841
F42A9.9	1.32981	-3.34914	4.87595	1.32981	4.2975	3.75201	1.72736e-05	0.000175423
gly-4	-6.99379	5.91025	-3.05363	-3.05363	-4.29651	-3.75201	1.73511e-05	0.000175423
F55G11.1	0.985041	-3.44764	5.07296	0.985041	4.2963	3.75201	1.73669e-05	0.000175423
T21B4.15	-5.91025	4.77745	-2.4626	-2.4626	-4.29035	-3.74612	1.78395e-05	0.000179593
aakb-1	-6.94454	5.81174	-2.70886	-2.70886	-4.28684	-3.743	1.81231e-05	0.000181838
cutl-20	0.985041	-2.95512	4.62969	0.985041	4.28145	3.73774	1.85682e-05	0.000185682
glb-11	-7.04304	3.84166	-2.21634	-2.21634	-4.27893	-3.73573	1.87792e-05	0.000187168
Y49A3A.3	-6.30426	5.02371	-2.41335	-2.41335	-4.27687	-3.73501	1.89544e-05	0.00018771
M01E5.3	0.788033	-3.74316	4.87595	0.788033	4.27681	3.73501	1.89588e-05	0.00018771
ZK185.2	-6.40277	5.41773	-3.15213	-3.15213	-4.27442	-3.73313	1.91634e-05	0.000189112
F59F4.3	3.34914	-5.41773	6.50127	3.34914	4.25947	3.71706	2.04916e-05	0.000201557
ZK287.7	0.788033	-3.74316	5.76249	0.788033	4.25698	3.71507	2.0721e-05	0.000203147
ptr-3	0.837285	-3.54615	5.91025	0.837285	4.25446	3.71305	2.09558e-05	0.00020478
F25B5.5	0.689529	-3.74316	5.22072	0.689529	4.24867	3.70733	2.15042e-05	0.000209456
nlp-77	-6.69828	5.51623	-3.00438	-3.00438	-4.24709	-3.70636	2.16569e-05	0.000210261
T07A9.10	-5.22072	3.4969	-1.87158	-1.87158	-4.23471	-3.69318	2.28846e-05	0.000221464
cwc-15	-7.48631	6.45202	-3.74316	-3.74316	-4.22947	-3.6886	2.34241e-05	0.000225493
C39B5.6	0.738781	-3.74316	5.02371	0.738781	4.22921	3.6886	2.34513e-05	0.000225493
T23B5.3	1.2313	-3.74316	4.97446	1.2313	4.22567	3.68541	2.38226e-05	0.000228332
Y48A6B.7	0.738781	-3.54615	5.61473	0.738781	4.22266	3.68321	2.41433e-05	0.000230319
T20B3.14	0.640277	-3.74316	5.02371	0.640277	4.22229	3.68321	2.41835e-05	0.000230319
col-129	-7.88033	7.04304	-5.07296	-5.07296	-4.21734	-3.67841	2.47206e-05	0.000234689
nhr-45	0.689529	-3.74316	4.77745	0.689529	4.21523	3.67684	2.49522e-05	0.000236141
T24C4.4	1.62532	-3.54615	5.07296	1.62532	4.21156	3.6735	2.53609e-05	0.000239254
tag-267	0.689529	-3.74316	5.56548	0.689529	4.21006	3.67259	2.55307e-05	0.000240101
Y37E11AM.2	0.788033	-3.74316	4.97446	0.788033	4.20601	3.66882	2.59915e-05	0.00024367
flp-1	0.640277	-3.54615	5.02371	0.640277	4.20424	3.6684	2.61964e-05	0.000244074
tsen-34	-5.71324	4.58044	-2.26559	-2.26559	-4.20423	-3.6684	2.61972e-05	0.000244074
dnj-11	-7.48631	6.20576	-3.54615	-3.54615	-4.20318	-3.66836	2.63189e-05	0.000244112
C06E2.1	0.837285	-3.10288	5.26997	0.837285	4.20279	3.66836	2.63641e-05	0.000244112
Y39A3CL.4	-5.56548	4.43268	-2.26559	-2.26559	-4.19559	-3.661	2.72165e-05	0.000251229
sorf-2	0.788033	-2.90587	4.48194	0.788033	4.19448	3.66054	2.73499e-05	0.000251686
ugt-58	3.39839	-4.87595	6.30426	3.39839	4.18743	3.65336	2.8213e-05	0.000258835
unc-62	0.640277	-3.79241	5.46698	0.640277	4.18264	3.64872	2.88144e-05	0.000263546
Y48E1C.4	0.689529	-3.4969	4.92521	0.689529	4.17717	3.64332	2.95157e-05	0.00026914
jmjd-5	0.591025	-3.5954	5.12221	0.591025	4.16383	3.62902	3.12948e-05	0.000284498
nlp-68	0.591025	-3.74316	5.02371	0.591025	4.15932	3.62469	3.192e-05	0.000289305
W04B5.1	1.97008	-3.74316	5.81174	1.97008	4.15694	3.62288	3.2254e-05	0.000291339
dss-1	-6.99379	5.9595	-3.5954	-3.5954	-4.15577	-3.62288	3.24194e-05	0.000291339
B0464.9	2.01933	-4.58044	5.91025	2.01933	4.15565	3.62288	3.24357e-05	0.000291339
DC2.5	-7.63407	6.40277	-4.53119	-4.53119	-4.15226	-3.61982	3.29206e-05	0.000294811
ostb-1	0.541773	-4.23568	5.41773	0.541773	4.15132	3.61953	3.30559e-05	0.000295142
plc-1	2.21634	-3.79241	5.51623	2.21634	4.15	3.6188	3.3247e-05	0.000295967
ZC13.2	2.26559	-4.48194	6.00875	2.26559	4.14571	3.61549	3.38758e-05	0.000299786
W03D8.9	0.640277	-3.74316	4.87595	0.640277	4.14457	3.61496	3.40448e-05	0.000300395
srx-123	0.541773	-3.74316	5.07296	0.541773	4.14372	3.61476	3.41712e-05	0.000300626
C02F12.8	0.591025	-3.74316	4.77745	0.591025	4.14285	3.61453	3.43014e-05	0.000300889
map-2	-6.25501	5.17147	-2.11784	-2.11784	-4.14048	-3.61261	3.46578e-05	0.000303129
zipt-2.4	0.541773	-3.5954	5.66399	0.541773	4.13254	3.60514	3.58783e-05	0.000311985
F07H5.7	-6.35351	5.46698	-2.11784	-2.11784	-4.12868	-3.60154	3.64846e-05	0.000316341
npp-3	-6.89529	5.71324	-2.11784	-2.11784	-4.11821	-3.59045	3.81822e-05	0.000330106
C45G3.3	0.640277	-3.25064	4.87595	0.640277	4.11406	3.58651	3.88755e-05	0.000335133
F15G9.6	-7.14155	6.15651	-2.65961	-2.65961	-4.11322	-3.5863	3.90183e-05	0.000335401
ifa-3	0.492521	-3.74316	4.62969	0.492521	4.10257	3.57501	4.08579e-05	0.000350211
Y37E11B.2	-6.45202	5.56548	-2.06859	-2.06859	-4.0968	-3.56922	4.18909e-05	0.000358042
cth-2	0.492521	-3.74316	4.8267	0.492521	4.09196	3.56449	4.27751e-05	0.00036456
tag-273	3.10288	-5.51623	6.55052	3.10288	4.08593	3.55916	4.39011e-05	0.000372044
arx-4	3.25064	-5.12221	6.50127	3.25064	4.08162	3.55502	4.47236e-05	0.000377946
Y51H7C.13	0.492521	-3.74316	4.8267	0.492521	4.08057	3.55458	4.49251e-05	0.000378582
gipc-2	0.492521	-3.4969	4.62969	0.492521	4.07895	3.55348	4.52395e-05	0.000380164
aqp-12	0.492521	-3.74316	4.77745	0.492521	4.07673	3.55171	4.56739e-05	0.000382742
rdy-2	0.640277	-3.44764	4.77745	0.640277	4.07355	3.54884	4.63021e-05	0.000386926
clh-2	-5.17147	3.34914	-1.87158	-1.87158	-4.07195	-3.54777	4.66215e-05	0.000388513
cyn-8	-7.0923	6.058	-3.94016	-3.94016	-4.06946	-3.54582	4.71221e-05	0.000391391
fbxa-101	0.492521	-3.54615	5.81174	0.492521	4.06894	3.54582	4.72278e-05	0.000391391
C36B7.6	-7.38781	6.20576	-3.98942	-3.98942	-4.06704	-3.5444	4.76144e-05	0.000393508
C07D8.6	0.591025	-3.4969	4.48194	0.591025	4.06516	3.543	4.80003e-05	0.000395607
Y46G5A.18	-6.50127	5.36847	-3.29989	-3.29989	-4.06282	-3.54107	4.84843e-05	0.000398501
Y49F6B.2	0.492521	-3.34914	4.87595	0.492521	4.05962	3.53818	4.91523e-05	0.000402888
apm-1	-5.46698	4.18642	-2.01933	-2.01933	-4.05482	-3.53348	5.01723e-05	0.000410128
C36B1.11	0.541773	-3.74316	4.8267	0.541773	4.0483	3.52682	5.15914e-05	0.000420582
Y17G9B.5	0.541773	-3.74316	4.8267	0.541773	4.04144	3.51978	5.31237e-05	0.0004319
Y40B1A.1	-6.69828	5.51623	-1.92083	-1.92083	-4.03874	-3.51745	5.37387e-05	0.000435719
elpc-2	-7.33856	6.50127	-2.56111	-2.56111	-4.03608	-3.51515	5.43522e-05	0.000439506
ephx-1	1.62532	-3.74316	5.36847	1.62532	4.03407	3.51377	5.4819e-05	0.000441798
F20D1.1	-6.89529	5.76249	-2.65961	-2.65961	-4.03354	-3.51377	5.49428e-05	0.000441798
bcl-11	3.10288	-5.07296	7.14155	3.10288	4.03296	3.51377	5.50775e-05	0.000441798
F09E5.8	-6.50127	5.61473	-2.21634	-2.21634	-4.03105	-3.51231	5.55283e-05	0.000444227
C16A3.4	0.443268	-3.54615	5.56548	0.443268	4.02975	3.51155	5.5836e-05	0.0004455
sur-2	-6.20576	5.22072	-3.39839	-3.39839	-4.02808	-3.51078	5.62351e-05	0.000446791
R04A9.3	0.591025	-3.54615	5.07296	0.591025	4.02782	3.51078	5.62957e-05	0.000446791
pxd-1	3.00438	-4.97446	6.10725	3.00438	4.02457	3.50781	5.70799e-05	0.00045182
col-38	2.21634	-3.79241	5.22072	2.21634	4.01898	3.50218	5.84517e-05	0.000461461
taf-8	0.443268	-4.03867	5.51623	0.443268	4.01712	3.50078	5.89146e-05	0.000463895
D2007.2	3.25064	-5.17147	6.59977	3.25064	4.01586	3.50006	5.92286e-05	0.000465146
sss-1	0.492521	-3.74316	4.87595	0.492521	4.01426	3.49895	5.96334e-05	0.000467102
miz-1	-5.12221	3.29989	-1.67457	-1.67457	-4.0098	-3.49461	6.07703e-05	0.000474764
aat-1	0.492521	-3.74316	5.22072	0.492521	4.00894	3.49461	6.0992e-05	0.000474764
B0019.2	0.541773	-3.74316	5.91025	0.541773	4.00857	3.49461	6.10862e-05	0.000474764
swan-2	2.3641	-4.28493	5.91025	2.3641	3.99948	3.48501	6.34826e-05	0.000492114
vgln-1	-7.33856	6.59977	-2.41335	-2.41335	-3.9923	-3.47825	6.54347e-05	0.000504706
ddx-19	-7.0923	6.30426	-1.92083	-1.92083	-3.99227	-3.47825	6.54436e-05	0.000504706
inos-1	-6.25501	3.34914	-1.82233	-1.82233	-3.98915	-3.47581	6.6311e-05	0.000509321
Y71F9AL.11	2.31485	-3.74316	5.36847	2.31485	3.9889	3.47581	6.63814e-05	0.000509321
T16G1.18	0.443268	-3.74316	4.8267	0.443268	3.98599	3.47321	6.71983e-05	0.000514273
rpb-11	2.70886	-4.28493	5.56548	2.70886	3.98464	3.47236	6.75829e-05	0.0005159
F15A4.2	-7.38781	6.45202	-1.97008	-1.97008	-3.98351	-3.47226	6.79047e-05	0.000516105
cfim-2	0.394016	-3.54615	5.36847	0.394016	3.98334	3.47226	6.79539e-05	0.000516105
nhr-242	0.443268	-3.54615	4.43268	0.443268	3.98204	3.47204	6.83273e-05	0.000516516
sorf-1	2.11784	-4.53119	6.058	2.11784	3.98195	3.47204	6.83523e-05	0.000516516
Y41D4A.6	0.443268	-3.05363	5.41773	0.443268	3.97508	3.46496	7.03553e-05	0.000530316
ain-2	-5.81174	3.74316	-1.87158	-1.87158	-3.974	-3.46441	7.06765e-05	0.000531402
ZK1098.11	0.394016	-3.74316	5.66399	0.394016	3.9728	3.46382	7.10339e-05	0.000532565
T25G12.6	-5.76249	4.67894	-2.3641	-2.3641	-3.97229	-3.46382	7.11862e-05	0.000532565
unc-13	-4.58044	2.85662	-1.47756	-1.47756	-3.9683	-3.46065	7.23874e-05	0.000538864
herc-1	0.394016	-3.74316	4.58044	0.394016	3.96481	3.45739	7.3453e-05	0.000545443
Y54F10AR.2	2.51185	-4.53119	5.9595	2.51185	3.96377	3.45687	7.37751e-05	0.000546482
mob-4	-6.79678	5.51623	-1.87158	-1.87158	-3.96262	-3.45624	7.41304e-05	0.000547761
Y71H2AM.11	-6.79678	5.61473	-2.01933	-2.01933	-3.95532	-3.44866	7.6432e-05	0.000563381
mig-22	0.492521	-3.54615	5.26997	0.492521	3.95141	3.4449	7.76929e-05	0.000571272
T23D8.3	-7.83108	7.33856	-1.82233	-1.82233	-3.94839	-3.44216	7.86776e-05	0.000577098
phf-34	0.443268	-3.54615	4.7282	0.443268	3.94776	3.4421	7.88851e-05	0.000577208
npp-2	-6.59977	5.51623	-2.51185	-2.51185	-3.94667	-3.44153	7.92445e-05	0.000578427
lyst-1	0.443268	-3.74316	4.33418	0.443268	3.94208	3.437	8.07781e-05	0.00058819
aho-3	-5.46698	4.03867	-1.82233	-1.82233	-3.93716	-3.4321	8.24524e-05	0.000598928
T06A10.107	0.394016	-3.00438	6.25501	0.394016	3.93474	3.43002	8.3287e-05	0.000603529
T19D2.3	0.394016	-3.74316	4.87595	0.394016	3.93115	3.42722	8.45407e-05	0.000609799
F48A9.2	0.344764	-3.74316	5.46698	0.344764	3.9311	3.42722	8.45588e-05	0.000609799
K07C11.8	-6.45202	5.31922	-1.92083	-1.92083	-3.92742	-3.42372	8.58605e-05	0.000617702
T28F4.5	-7.14155	5.9595	-3.15213	-3.15213	-3.92522	-3.42204	8.66522e-05	0.00062153
tin-9.1	0.394016	-3.54615	5.71324	0.394016	3.92479	3.42204	8.6807e-05	0.00062153
T24H7.8	0.344764	-3.34914	4.77745	0.344764	3.92223	3.4198	8.77327e-05	0.000626662
Y48C3A.5	0.443268	-3.10288	4.48194	0.443268	3.92079	3.41882	8.82604e-05	0.000628934
fut-8	-6.10725	5.02371	-2.01933	-2.01933	-3.91953	-3.41805	8.87222e-05	0.000630726
egl-47	0.394016	-3.74316	4.97446	0.394016	3.9182	3.4177	8.92116e-05	0.000631524
F59C12.3	0.591025	-3.34914	4.87595	0.591025	3.91808	3.4177	8.92555e-05	0.000631524
nape-1	0.344764	-3.74316	4.8267	0.344764	3.91675	3.41734	8.97495e-05	0.000632352
syd-1	3.00438	-6.00875	7.43706	3.00438	3.91508	3.41623	9.03728e-05	0.000634937
W03F8.6	0.394016	-3.4969	4.48194	0.394016	3.91308	3.41461	9.11273e-05	0.000638743
C48B6.3	1.87158	-3.44764	5.26997	1.87158	3.9063	3.4076	9.37188e-05	0.000655377
asg-2	-7.0923	6.00875	-3.44764	-3.44764	-3.90535	-3.40715	9.40908e-05	0.000656447
stdh-1	2.85662	-6.15651	7.33856	2.85662	3.89663	3.39795	9.75395e-05	0.000678929
sumv-1	-6.00875	4.53119	-1.77307	-1.77307	-3.89566	-3.39748	9.79335e-05	0.000680094
sid-1	0.443268	-3.74316	4.92521	0.443268	3.89499	3.39736	9.82035e-05	0.000680394
Y71F9B.6	0.344764	-3.74316	5.31922	0.344764	3.89128	3.39381	9.97156e-05	0.000689278
Y65B4BL.6	2.4626	-4.48194	8.02808	2.4626	3.88412	3.38663	0.000102701	0.00070758
Y47D3A.20	0.344764	-3.4969	5.02371	0.344764	3.88339	3.38663	0.000103012	0.00070758
irld-26	0.344764	-3.54615	4.97446	0.344764	3.88325	3.38663	0.000103071	0.00070758
Y111B2A.3	-6.10725	4.77745	-1.67457	-1.67457	-3.87847	-3.38186	0.000105117	0.000719981
ppm-2	2.95512	-3.84166	5.9595	2.95512	3.87578	3.38006	0.000106283	0.000724706
F26A3.7	0.344764	-3.54615	5.17147	0.344764	3.87525	3.38006	0.000106516	0.000724706
ska-3	-5.9595	4.8267	-1.72382	-1.72382	-3.87521	-3.38006	0.000106532	0.000724706
C46F11.6	-6.45202	5.36847	-2.06859	-2.06859	-3.87423	-3.37957	0.000106963	0.000725996
C18E3.3	0.344764	-3.34914	4.7282	0.344764	3.87141	3.37701	0.00010821	0.000732796
osta-2	3.05363	-5.51623	6.55052	3.05363	3.86997	3.37601	0.000108847	0.000735449
mvb-12	-6.10725	4.67894	-2.11784	-2.11784	-3.86899	-3.37552	0.000109287	0.000736764
ttr-54	2.61036	-5.17147	6.55052	2.61036	3.86792	3.37493	0.000109766	0.000738336
gst-19	-6.55052	5.41773	-1.67457	-1.67457	-3.86663	-3.37447	0.000110348	0.000739575
col-81	-7.68332	7.14155	-2.61036	-2.61036	-3.86642	-3.37447	0.000110443	0.000739575
F52D2.7	0.443268	-3.54615	4.87595	0.443268	3.86547	3.37401	0.000110877	0.000740828
C36A4.4	-6.55052	5.46698	-2.16709	-2.16709	-3.86127	-3.36989	0.000112799	0.000751995
ZK1128.1	0.344764	-2.06859	4.23568	0.344764	3.85856	3.36744	0.000114058	0.000758699
C06H2.2	0.394016	-3.39839	5.07296	0.394016	3.85407	3.36299	0.00011617	0.000771039
sng-1	-7.1908	6.40277	-2.06859	-2.06859	-3.85231	-3.36161	0.000117008	0.00077489
nlp-43	1.47756	-3.05363	4.58044	1.47756	3.84964	3.35921	0.00011829	0.000781651
nhr-100	2.56111	-6.058	7.14155	2.56111	3.84454	3.35406	0.000120778	0.00079634
B0272.3	-6.94454	3.34914	-1.62532	-1.62532	-3.84377	-3.3538	0.000121159	0.0007971
hpo-13	-6.64903	5.12221	-2.26559	-2.26559	-3.8405	-3.35104	0.000122786	0.000805089
unc-58	2.70886	-4.8267	6.35351	2.70886	3.84025	3.35104	0.00012291	0.000805089
T13F3.6	-5.71324	4.58044	-1.77307	-1.77307	-3.83893	-3.35072	0.000123573	0.000806008
glb-24	-5.46698	3.98942	-2.01933	-2.01933	-3.8389	-3.35072	0.000123588	0.000806008
ddx-52	0.394016	-3.74316	5.61473	0.394016	3.83756	3.34981	0.000124264	0.000808662
hpo-29	0.344764	-3.54615	5.41773	0.344764	3.83668	3.34942	0.000124711	0.000809812
cdk-9	2.70886	-4.77745	6.10725	2.70886	3.83542	3.3486	0.000125352	0.000812215
spt-5	-6.058	4.62969	-1.67457	-1.67457	-3.83291	-3.34684	0.000126635	0.000817378
B0513.4	0.295512	-3.74316	4.67894	0.295512	3.8328	3.34684	0.000126694	0.000817378
F40E10.6	-5.86099	3.25064	-1.67457	-1.67457	-3.83114	-3.34557	0.000127549	0.000821128
madf-3	-6.058	5.12221	-1.67457	-1.67457	-3.82904	-3.3438	0.000128644	0.000826405
ruvb-2	0.344764	-3.4969	4.92521	0.344764	3.82801	3.34322	0.000129185	0.000828109
Y106G6G.4	0.295512	-3.54615	4.77745	0.295512	3.82735	3.34308	0.00012953	0.000828547
plc-4	0.344764	-3.39839	4.87595	0.344764	3.82386	3.33973	0.000131381	0.000838599
Y54G11A.19	-7.14155	4.13717	-2.06859	-2.06859	-3.81469	-3.32999	0.000136352	0.000868485
JC8.4	0.295512	-3.54615	4.62969	0.295512	3.81358	3.32932	0.00013697	0.000870573
tag-266	0.295512	-3.39839	4.87595	0.295512	3.81252	3.32902	0.000137559	0.000871509
K11D12.13	0.344764	-3.74316	4.77745	0.344764	3.81227	3.32902	0.000137698	0.000871509
F56B3.11	2.01933	-4.48194	5.66399	2.01933	3.80793	3.32472	0.000140137	0.000885075
fmil-1	-4.28493	2.65961	-1.32981	-1.32981	-3.80206	-3.31869	0.0001435	0.000904409
fbxa-143	0.344764	-3.4969	4.58044	0.344764	3.80066	3.3177	0.000144312	0.000907624
F46F11.7	0.295512	-3.74316	4.92521	0.295512	3.79447	3.31131	0.00014796	0.000928619
B0393.3	0.295512	-3.34914	4.97446	0.295512	3.79214	3.30927	0.000149352	0.000935398
ulp-1	-6.74753	5.66399	-1.57607	-1.57607	-3.7895	-3.30741	0.000150953	0.000941646
hrdl-1	-6.64903	5.61473	-1.62532	-1.62532	-3.78946	-3.30741	0.000150977	0.000941646
cpi-1	1.37906	-3.74316	5.31922	1.37906	3.78716	3.30542	0.000152379	0.000948325
klp-16	0.295512	-3.74316	5.9595	0.295512	3.78667	3.30542	0.00015268	0.000948325
F36G3.3	0.394016	-3.74316	4.77745	0.394016	3.78197	3.30114	0.000155593	0.000962936
T02E1.2	-6.10725	4.58044	-1.62532	-1.62532	-3.78184	-3.30114	0.000155675	0.000962936
mrps-2	-7.1908	6.10725	-2.90587	-2.90587	-3.77969	-3.29929	0.000157025	0.000969288
mut-16	-6.058	4.77745	-1.77307	-1.77307	-3.77751	-3.29741	0.000158406	0.000975808
nlp-66	0.295512	-3.54615	5.41773	0.295512	3.77662	3.29698	0.000158973	0.000977293
H16D19.4	0.295512	-3.54615	4.8267	0.295512	3.76795	3.28829	0.000164595	0.00100796
dpy-27	2.80737	-4.67894	5.76249	2.80737	3.76789	3.28829	0.000164634	0.00100796
R12E2.14	2.65961	-4.38343	7.33856	2.65961	3.76332	3.28372	0.00016767	0.00102446
F28E10.1	2.70886	-6.20576	7.2893	2.70886	3.75685	3.277	0.000172063	0.00104917
CD4.11	0.295512	-3.25064	4.87595	0.295512	3.75634	3.27699	0.000172419	0.0010492
wdfy-2	-7.58482	3.54615	-1.52681	-1.52681	-3.74913	-3.27001	0.000177448	0.00107544
F25B5.6	0.295512	-3.54615	4.97446	0.295512	3.74661	3.26773	0.000179242	0.00108412
Y17G7B.10	0.295512	-3.74316	4.8267	0.295512	3.74583	3.26743	0.000179796	0.00108529
W02D7.6	2.70886	-4.8267	6.20576	2.70886	3.73657	3.25756	0.000186545	0.00112376
T01H3.2	0.295512	-3.74316	4.77745	0.295512	3.73077	3.25158	0.000190893	0.00114765
Y34F4.5	0.24626	-3.5954	6.00875	0.24626	3.72898	3.25013	0.000192256	0.00115354
snf-3	-6.10725	2.61036	-1.52681	-1.52681	-3.72808	-3.24967	0.000192947	0.00115537
ril-1	-4.97446	3.64465	-1.62532	-1.62532	-3.72348	-3.24593	0.000196492	0.00117068
rnh-1.3	0.344764	-2.56111	3.94016	0.344764	3.72155	3.24458	0.000198001	0.00117624
K12H6.6	0.24626	-3.39839	4.92521	0.24626	3.72007	3.24346	0.000199171	0.00118086
F38E11.9	0.24626	-3.74316	5.36847	0.24626	3.71179	3.23469	0.000205797	0.00121773
F56G4.7	1.37906	-3.74316	6.058	1.37906	3.71124	3.23463	0.000206248	0.001218
ugt-41	0.295512	-3.25064	4.67894	0.295512	3.71056	3.23443	0.000206801	0.00121886
B0222.5	0.295512	-3.00438	4.33418	0.295512	3.70746	3.23149	0.000209348	0.00123146
gfl-1	0.24626	-3.74316	4.58044	0.24626	3.69922	3.22287	0.000216267	0.00126911
F28H6.8	0.295512	-3.54615	4.97446	0.295512	3.69577	3.21998	0.000219224	0.00128201
egl-36	0.24626	-3.15213	4.48194	0.24626	3.69161	3.21584	0.000222843	0.00130064
Y54H5A.2	-6.35351	5.36847	-1.42831	-1.42831	-3.68782	-3.21213	0.000226181	0.00131756
pde-3	-6.89529	6.00875	-2.01933	-2.01933	-3.68538	-3.20992	0.000228365	0.0013277
vps-26	0.935789	-3.4969	5.76249	0.935789	3.68133	3.20647	0.000232017	0.00134373
Y56A3A.30	0.24626	-3.25064	4.7282	0.24626	3.67772	3.20295	0.000235325	0.00136026
rpb-4	1.92083	-4.8267	6.25501	1.92083	3.67723	3.20295	0.000235785	0.0013603
rad-23	-4.33418	2.65961	-1.2313	-1.2313	-3.67624	-3.20274	0.000236696	0.00136129
sgn-1	-6.30426	5.22072	-1.47756	-1.47756	-3.67606	-3.20274	0.000236864	0.00136129
rtel-1	0.24626	-3.74316	5.41773	0.24626	3.67456	3.20159	0.000238264	0.00136671
C23G10.7	0.886537	-3.74316	5.26997	0.886537	3.66809	3.19485	0.000244368	0.00139905
abl-1	0.935789	-3.4969	5.31922	0.935789	3.66641	3.1935	0.000245977	0.00140558
K09F6.13	-3.54615	2.11784	-0.935789	-0.935789	-3.65871	-3.18536	0.000253484	0.00144572
T03F7.5	2.11784	-4.62969	5.91025	2.11784	3.6552	3.18194	0.000256983	0.0014629
K01G5.10	0.24626	-4.67894	5.71324	0.24626	3.65143	3.17869	0.000260782	0.00147944
inpp-1	0.295512	-3.54615	4.43268	0.295512	3.65134	3.17869	0.000260875	0.00147944
C08A9.10	1.1328	-3.4969	5.07296	1.1328	3.64923	3.17685	0.00026303	0.00148885
C31E10.6	1.42831	-3.74316	5.26997	1.42831	3.64667	3.17451	0.000265663	0.00150092
lex-1	1.42831	-3.74316	5.66399	1.42831	3.64377	3.17178	0.000268675	0.00151509
W04D2.4	0.24626	-3.5954	5.07296	0.24626	3.63411	3.16142	0.000278942	0.00157003
D1044.6	-7.14155	6.15651	-3.05363	-3.05363	-3.62667	-3.15465	0.000287104	0.00160693
C37H5.5	-5.9595	2.56111	-1.37906	-1.37906	-3.62384	-3.152	0.000290258	0.00162155
pmp-1	0.24626	-4.48194	5.31922	0.24626	3.61863	3.1472	0.000296166	0.00164842
B0261.6	0.24626	-3.5954	4.87595	0.24626	3.6177	3.1467	0.000297227	0.00165126
bca-2	0.24626	-3.74316	4.67894	0.24626	3.61694	3.14654	0.000298111	0.00165213
ivd-1	2.75811	-5.41773	6.79678	2.75811	3.61661	3.14654	0.000298485	0.00165213
abts-3	-6.30426	4.92521	-2.61036	-2.61036	-3.61077	-3.14103	0.000305288	0.00168357
ZK1236.5	0.24626	-3.74316	4.62969	0.24626	3.60764	3.13802	0.000308998	0.00170091
col-93	-5.9595	3.64465	-1.82233	-1.82233	-3.60356	-3.13396	0.000313888	0.00172466
swan-1	-6.35351	5.12221	-1.37906	-1.37906	-3.60185	-3.13296	0.000315955	0.00173051
nmtn-1	-4.7282	2.95512	-1.28055	-1.28055	-3.60104	-3.13296	0.000316947	0.00173051
W01G7.4	-6.20576	4.97446	-2.4626	-2.4626	-3.60078	-3.13296	0.000317259	0.00173051
ztf-23	2.56111	-5.91025	7.43706	2.56111	3.59767	3.12998	0.000321082	0.00174818
mel-32	-5.71324	4.67894	-1.57607	-1.57607	-3.59624	-3.1289	0.000322849	0.00175461
Y48A6C.4	0.197008	-3.25064	4.8267	0.197008	3.59304	3.12614	0.000326836	0.0017712
nspb-12	0.197008	-3.74316	4.62969	0.197008	3.59128	3.1249	0.000329055	0.00177868
pbs-6	2.11784	-5.46698	6.79678	2.11784	3.59006	3.12404	0.000330607	0.00178385
M60.4	-6.20576	5.02371	-1.32981	-1.32981	-3.58893	-3.12345	0.000332037	0.00178747
rer-1	-4.53119	2.95512	-1.42831	-1.42831	-3.58806	-3.12345	0.000333144	0.00178747
F13B9.2	1.62532	-3.39839	5.07296	1.62532	3.58321	3.11896	0.000339392	0.00181493
mrpl-32	0.24626	-3.54615	4.92521	0.24626	3.57604	3.11343	0.000348838	0.00184927
D1081.6	-7.48631	6.79678	-1.32981	-1.32981	-3.57554	-3.11343	0.000349512	0.00184927
D1007.4	0.197008	-3.54615	5.26997	0.197008	3.57089	3.10923	0.000355766	0.00187574
C49F5.7	-7.38781	6.55052	-1.18205	-1.18205	-3.56617	-3.10443	0.00036223	0.00190648
T26C11.9	-6.79678	5.81174	-1.2313	-1.2313	-3.56256	-3.10086	0.000367261	0.00192957
ari-1.4	-6.84603	5.86099	-2.41335	-2.41335	-3.55978	-3.09825	0.000371163	0.00194666
T10B5.4	-4.33418	2.56111	-1.18205	-1.18205	-3.55236	-3.09039	0.000381795	0.00199893
hpk-1	-5.91025	3.15213	-1.52681	-1.52681	-3.55157	-3.09002	0.000382946	0.00200146
col-184	-7.43706	6.40277	-3.05363	-3.05363	-3.54914	-3.08779	0.000386493	0.00201648
acdh-13	0.197008	-3.74316	5.22072	0.197008	3.54415	3.08371	0.000393888	0.0020444
Y71F9AL.9	2.3641	-4.67894	6.64903	2.3641	3.54181	3.08176	0.000397397	0.00205782
B0250.5	2.70886	-4.8267	6.25501	2.70886	3.54151	3.08176	0.000397845	0.00205782
C04E7.3	0.886537	-3.74316	4.7282	0.886537	3.53885	3.07975	0.000401876	0.00207171
T20H4.5	-6.69828	3.15213	-1.62532	-1.62532	-3.53882	-3.07975	0.000401913	0.00207171
Y38A10A.7	-6.99379	6.10725	-1.47756	-1.47756	-3.53735	-3.07878	0.000404163	0.00207851
Y43F4A.1	0.197008	-2.80737	5.12221	0.197008	3.5336	3.07568	0.000409933	0.00210024
Y53G8AL.1	0.935789	-3.25064	5.61473	0.935789	3.53295	3.07568	0.000410946	0.00210024
agmo-1	-5.76249	4.38343	-1.2313	-1.2313	-3.52844	-3.07115	0.000418012	0.00213235
Y73E7A.3	0.886537	-3.74316	5.71324	0.886537	3.52758	3.07114	0.000419383	0.00213245
C52B9.4	2.11784	-3.74316	5.9595	2.11784	3.52549	3.06988	0.000422702	0.00214146
ZK897.10	0.197008	-3.74316	4.67894	0.197008	3.52516	3.06988	0.000423229	0.00214146
D1014.4	-6.94454	2.51185	-1.2313	-1.2313	-3.52448	-3.06988	0.000424316	0.00214146
C17F4.2	-7.14155	5.86099	-2.80737	-2.80737	-3.52432	-3.06988	0.000424576	0.00214146
aipr-1	1.67457	-3.74316	5.26997	1.67457	3.52406	3.06988	0.000424988	0.00214146
Y67D2.7	0.197008	-3.54615	4.7282	0.197008	3.52378	3.06988	0.000425437	0.00214146
mtrr-1	0.197008	-3.74316	4.97446	0.197008	3.51924	3.06527	0.000432779	0.00217477
scrm-1	-6.30426	5.17147	-2.11784	-2.11784	-3.51486	-3.06132	0.000439992	0.00220363
F15D4.2	1.52681	-3.74316	5.26997	1.52681	3.50394	3.04952	0.00045842	0.0022921
csb-1	1.28055	-4.48194	5.71324	1.28055	3.49453	3.04011	0.000474904	0.0023649
rba-1	-6.94454	5.9595	-1.03429	-1.03429	-3.48688	-3.03376	0.000488689	0.00241527
mml-1	2.65961	-7.43706	8.37285	2.65961	3.48582	3.03306	0.000490627	0.00242086
nlp-30	-5.71324	4.43268	-1.2313	-1.2313	-3.48416	-3.03169	0.000493677	0.00243191
dars-1	-7.04304	3.34914	-1.47756	-1.47756	-3.4832	-3.0311	0.00049545	0.00243664
ptc-1	2.21634	-7.14155	8.27434	2.21634	3.47471	3.02301	0.000511397	0.00250276
M03F8.3	-5.61473	3.25064	-1.2313	-1.2313	-3.4724	-3.02089	0.000515825	0.00252032
dhs-30	1.87158	-3.74316	5.22072	1.87158	3.47146	3.02032	0.000517642	0.00252508
F53F4.14	0.197008	-3.54615	4.58044	0.197008	3.47079	3.02006	0.000518925	0.00252723
K07E3.1	-6.79678	5.56548	-3.00438	-3.00438	-3.47025	-3.01995	0.000519965	0.00252819
mcu-1	-5.41773	4.03867	-1.18205	-1.18205	-3.46826	-3.01818	0.000523847	0.00254295
swsn-9	-7.04304	3.79241	-1.67457	-1.67457	-3.46545	-3.0155	0.000529352	0.00256552
hal-3	0.147756	-3.54615	5.46698	0.147756	3.46201	3.01212	0.000536155	0.0025943
C30A5.10	-5.46698	4.38343	-1.42831	-1.42831	-3.4611	-3.01158	0.000537975	0.00259891
ndc-80	0.147756	-3.74316	4.92521	0.147756	3.45924	3.01046	0.000541704	0.00260853
eef-1A.2	-4.43268	2.75811	-1.18205	-1.18205	-3.4554	-3.0071	0.000549478	0.0026375
dep-1	-5.9595	4.58044	-1.1328	-1.1328	-3.45448	-3.00655	0.000551358	0.00264229
adm-2	-7.04304	5.91025	-2.31485	-2.31485	-3.443	-2.99556	0.000575302	0.00273937
gop-1	0.147756	-3.4969	4.97446	0.147756	3.44259	2.99556	0.000576181	0.00273937
vps-16	-6.50127	5.41773	-1.08355	-1.08355	-3.44006	-2.9932	0.000581589	0.00276071
Y37H9A.3	-7.33856	6.45202	-3.74316	-3.74316	-3.4379	-2.99125	0.00058624	0.00277839
sfxn-1.5	-5.46698	4.23568	-1.1328	-1.1328	-3.43744	-2.99121	0.000587234	0.00277871
ric-7	-6.55052	5.17147	-1.87158	-1.87158	-3.43302	-2.98719	0.000596896	0.00281555
sul-2	1.28055	-3.44764	4.92521	1.28055	3.43229	2.98685	0.000598499	0.00281868
cec-5	-4.7282	3.00438	-1.2313	-1.2313	-3.42814	-2.98265	0.000607731	0.00285767
akir-1	-6.79678	3.54615	-1.57607	-1.57607	-3.42462	-2.98002	0.00061566	0.0028823
eif-3.I	-6.79678	3.34914	-1.42831	-1.42831	-3.42454	-2.98002	0.000615852	0.0028823
aakg-3	0.147756	-3.4969	4.92521	0.147756	3.42259	2.97909	0.000620275	0.00289109
mrpl-30	-6.35351	5.02371	-1.2313	-1.2313	-3.4216	-2.97909	0.000622532	0.00289109
Y40B1A.3	-5.9595	2.65961	-1.08355	-1.08355	-3.4216	-2.97909	0.000622548	0.00289109
F54F7.6	-6.15651	5.22072	-1.1328	-1.1328	-3.41985	-2.97759	0.000626559	0.00290522
F17A9.4	-7.0923	6.15651	-1.67457	-1.67457	-3.41375	-2.97202	0.000640745	0.0029585
snt-3	-6.55052	3.98942	-1.42831	-1.42831	-3.41364	-2.97202	0.000641008	0.0029585
pll-1	-6.94454	5.81174	-2.75811	-2.75811	-3.4094	-2.96772	0.000651048	0.00300022
K02F3.12	-7.0923	5.81174	-2.90587	-2.90587	-3.40865	-2.96733	0.000652857	0.00300394
nhr-20	2.21634	-3.74316	6.15651	2.21634	3.40455	2.96319	0.000662737	0.00304473
tpk-1	-5.81174	2.21634	-1.18205	-1.18205	-3.39872	-2.95709	0.00067702	0.0031056
zfp-3	0.541773	-3.39839	5.07296	0.541773	3.39785	2.95658	0.000679175	0.00311073
Y50D7A.1	0.738781	-3.74316	5.51623	0.738781	3.39302	2.95208	0.000691264	0.00315646
linc-6	0.147756	-3.4969	4.23568	0.147756	3.38987	2.949	0.00069925	0.00318807
gtr-1	1.82233	-3.54615	5.31922	1.82233	3.37776	2.93721	0.000730795	0.00331176
T04F8.8	-5.56548	4.28493	-1.47756	-1.47756	-3.37665	-2.93644	0.000733738	0.00332008
M106.8	-6.94454	5.71324	-1.77307	-1.77307	-3.3721	-2.93177	0.000745969	0.00337034
moa-2	2.01933	-6.74753	7.88033	2.01933	3.37138	2.93142	0.000747935	0.00337414
srx-59	1.92083	-4.67894	6.058	1.92083	3.36663	2.92794	0.000760916	0.00341218
patr-1	-7.63407	6.94454	-2.06859	-2.06859	-3.3626	-2.92386	0.000772108	0.0034572
dnj-8	-5.66399	3.39839	-1.32981	-1.32981	-3.36161	-2.9232	0.000774905	0.00346455
sto-5	-3.84166	2.31485	-0.886537	-0.886537	-3.35341	-2.91581	0.000798218	0.00354764
icl-1	-6.55052	5.36847	-0.935789	-0.935789	-3.35131	-2.9139	0.000804309	0.00356942
F18E3.13	-5.86099	4.77745	-1.08355	-1.08355	-3.35007	-2.91297	0.000807915	0.00358013
Y48A6C.2	-5.9595	4.7282	-1.57607	-1.57607	-3.34671	-2.90964	0.000817779	0.00361849
adbp-1	1.82233	-3.44764	5.26997	1.82233	3.34243	2.90527	0.000830489	0.00366932
T27A1.1	0.147756	-3.54615	5.07296	0.147756	3.33441	2.89807	0.000854816	0.00375468
ZK616.3	-6.59977	5.56548	-0.935789	-0.935789	-3.33097	-2.89465	0.000865438	0.00379578
C09D4.4	2.16709	-3.89091	5.56548	2.16709	3.32868	2.89299	0.000872582	0.00381596
tbc-8	-5.51623	3.5954	-1.37906	-1.37906	-3.32741	-2.89201	0.000876585	0.00382788
F14E5.2	-6.35351	3.84166	-1.67457	-1.67457	-3.32492	-2.88998	0.000884431	0.00385266
R05D3.8	0.689529	-3.39839	5.07296	0.689529	3.3248	2.88998	0.000884828	0.00385266
skr-20	2.01933	-5.26997	6.59977	2.01933	3.32201	2.88775	0.000893699	0.00388003
rme-8	-6.10725	2.3641	-1.18205	-1.18205	-3.31789	-2.88502	0.000906989	0.00391391
C05C10.2	-6.45202	5.46698	-0.886537	-0.886537	-3.31757	-2.88502	0.000908027	0.00391391
vps-4	0.443268	-3.74316	5.22072	0.443268	3.31713	2.88497	0.000909479	0.00391454
cpx-1	-4.97446	3.15213	-1.32981	-1.32981	-3.30788	-2.87545	0.000940051	0.00403455
ZK686.1	-6.058	4.7282	-0.886537	-0.886537	-3.30703	-2.87494	0.000942917	0.00404107
ntl-9	1.62532	-3.44764	5.36847	1.62532	3.30585	2.87451	0.000946882	0.00404651
tric-1B.1	-6.35351	5.07296	-1.1328	-1.1328	-3.30398	-2.87328	0.000953225	0.00406236
mlc-4	-6.79678	3.44764	-1.37906	-1.37906	-3.30304	-2.87269	0.000956421	0.00406988
pgp-2	0.492521	-3.74316	5.56548	0.492521	3.30102	2.87086	0.000963346	0.00409354
dpy-18	0.689529	-3.44764	5.12221	0.689529	3.2977	2.86757	0.000974797	0.00413634
ceh-20	0.886537	-3.74316	5.26997	0.886537	3.29288	2.86275	0.000991674	0.00419986
rrn-2.1	-6.99379	3.6939	-1.62532	-1.62532	-3.29123	-2.86162	0.000997507	0.00421482
kin-3	-4.87595	3.00438	-1.2313	-1.2313	-3.28891	-2.85945	0.00100577	0.00424374
eme-1	-5.91025	3.74316	-1.62532	-1.62532	-3.28691	-2.85812	0.00101295	0.00426164
oma-1	0.0985041	-2.90587	4.38343	0.0985041	3.28654	2.85812	0.00101427	0.00426164
vti-1	-5.61473	4.48194	-1.77307	-1.77307	-3.2851	-2.85694	0.00101947	0.00427751
epg-8	-4.92521	3.79241	-0.935789	-0.935789	-3.28377	-2.85589	0.00102427	0.00429164
F56G4.4	-6.59977	5.46698	-0.837285	-0.837285	-3.28279	-2.85522	0.00102786	0.00430069
grk-1	-4.13717	2.21634	-0.935789	-0.935789	-3.28174	-2.85493	0.00103169	0.00430467
F20A1.1	-6.59977	5.51623	-0.886537	-0.886537	-3.27961	-2.85341	0.0010395	0.00432524
immp-1	-6.10725	5.07296	-2.26559	-2.26559	-3.2743	-2.84831	0.00105925	0.00439524
rbc-1	-5.71324	3.39839	-1.42831	-1.42831	-3.27269	-2.84694	0.0010653	0.00441422
ribo-1	1.62532	-3.6939	5.76249	1.62532	3.27204	2.84664	0.00106776	0.00441832
prp-19	-6.15651	4.87595	-0.886537	-0.886537	-3.26974	-2.8445	0.00107646	0.00444817
ZK632.9	-7.73257	3.29989	-1.32981	-1.32981	-3.25863	-2.83286	0.00111951	0.00461339
snrp-27	2.11784	-5.07296	6.25501	2.11784	3.25644	2.83083	0.00112819	0.00464275
F36G9.4	0.0985041	-3.05363	4.28493	0.0985041	3.25463	2.82967	0.0011354	0.00465965
ncs-3	1.32981	-3.54615	5.56548	1.32981	3.24328	2.81732	0.00118161	0.00484267
ZK180.7	-4.13717	2.41335	-0.985041	-0.985041	-3.24268	-2.81708	0.00118412	0.00484632
mtk-1	-6.10725	4.87595	-0.985041	-0.985041	-3.24151	-2.81663	0.00118898	0.00485297
Y52B11A.10	-5.26997	3.94016	-0.935789	-0.935789	-3.24015	-2.81597	0.00119468	0.004863
T14B4.8	-5.9595	4.77745	-0.837285	-0.837285	-3.23944	-2.81576	0.00119764	0.00486615
R07B7.6	-7.63407	6.99379	-0.788033	-0.788033	-3.23919	-2.81576	0.00119869	0.00486615
C55A6.1	-6.00875	4.87595	-0.837285	-0.837285	-3.23019	-2.80736	0.00123708	0.00499495
ZK177.8	-6.00875	4.8267	-0.837285	-0.837285	-3.22924	-2.80716	0.00124119	0.0049981
rpl-11.1	0.591025	-4.38343	5.46698	0.591025	3.22796	2.80614	0.00124678	0.00501385
R11H6.6	0.394016	-3.74316	4.92521	0.394016	3.22337	2.80166	0.00126694	0.00508403
sqst-1	-6.99379	5.81174	-2.11784	-2.11784	-3.21502	-2.79445	0.00130437	0.00519886
vars-1	-6.55052	5.36847	-1.82233	-1.82233	-3.21359	-2.79341	0.00131086	0.00521562
frpr-8	-5.71324	4.62969	-0.837285	-0.837285	-3.21259	-2.7927	0.00131546	0.00522698
T08B2.4	-5.36847	4.28493	-0.886537	-0.886537	-3.21001	-2.79023	0.00132729	0.00526702
rbm-22	1.32981	-3.6939	4.92521	1.32981	3.20824	2.78869	0.0013355	0.00529209
F54F11.1	0.443268	-2.61036	4.28493	0.443268	3.19822	2.77994	0.00138277	0.00543684
csk-1	-6.25501	5.36847	-0.788033	-0.788033	-3.19076	-2.77324	0.00141899	0.00555014
sgt-1	-5.02371	3.25064	-1.1328	-1.1328	-3.19012	-2.77294	0.00142215	0.00555527
ntl-3	2.06859	-5.51623	7.0923	2.06859	3.18753	2.77045	0.00143494	0.00559794
C32D5.8	-6.35351	4.62969	-1.87158	-1.87158	-3.17843	-2.76105	0.00148072	0.00576157
F45H10.3	-4.38343	2.80737	-0.985041	-0.985041	-3.17549	-2.75816	0.00149584	0.00581286
Y57G11A.2	0.0985041	-2.80737	4.18642	0.0985041	3.1722	2.75487	0.0015129	0.00587155
rnr-2	-5.07296	2.95512	-1.08355	-1.08355	-3.16898	-2.75209	0.00152975	0.00592163
pdl-1	-5.66399	3.15213	-1.1328	-1.1328	-3.1611	-2.74532	0.00157175	0.00604519
flp-14	0.935789	-2.61036	5.22072	0.935789	3.15006	2.73385	0.00163238	0.00625987
gkow-1	-7.2893	6.40277	-2.85662	-2.85662	-3.14998	-2.73385	0.00163279	0.00625987
hmbx-1	-4.97446	2.95512	-1.18205	-1.18205	-3.14943	-2.73385	0.00163591	0.00625987
coq-3	-6.84603	5.71324	-2.3641	-2.3641	-3.13799	-2.72301	0.00170109	0.006469
dnc-5	-5.9595	4.8267	-0.837285	-0.837285	-3.13795	-2.72301	0.00170135	0.006469
R11G1.2	1.92083	-5.51623	6.64903	1.92083	3.13723	2.72264	0.00170554	0.00647624
Y94H6A.3	-5.81174	4.23568	-0.689529	-0.689529	-3.13249	-2.71895	0.0017333	0.00654898
pmp-3	-6.99379	6.058	-1.77307	-1.77307	-3.12758	-2.71467	0.0017625	0.00663425
cpsf-3	-7.24005	5.9595	-2.26559	-2.26559	-3.12514	-2.71253	0.00177722	0.00667712
linc-44	-5.71324	4.7282	-0.935789	-0.935789	-3.12228	-2.70994	0.00179454	0.00672953
K10C3.5	-6.99379	5.81174	-2.26559	-2.26559	-3.1156	-2.70283	0.0018357	0.00687526
frpr-11	0.295512	-3.4969	4.8267	0.295512	3.11034	2.69772	0.00186873	0.00698156
Y41E3.1	0.640277	-3.20138	4.87595	0.640277	3.10909	2.69673	0.00187664	0.00700238
F53B7.7	-4.48194	2.56111	-0.985041	-0.985041	-3.10564	-2.69367	0.00189869	0.00706708
F47E1.1	-5.81174	4.43268	-0.689529	-0.689529	-3.1043	-2.69257	0.00190733	0.00709044
mec-15	-6.00875	4.7282	-1.67457	-1.67457	-3.10315	-2.6921	0.00191471	0.00710029
T02E1.8	-6.59977	5.51623	-1.87158	-1.87158	-3.10182	-2.69102	0.00192332	0.00712341
ZK809.5	-6.79678	5.56548	-0.640277	-0.640277	-3.09802	-2.68777	0.00194817	0.00719319
F10D11.2	-6.10725	3.5954	-1.42831	-1.42831	-3.09201	-2.68367	0.00198805	0.00728199
lin-53	-6.64903	5.61473	-0.689529	-0.689529	-3.09195	-2.68367	0.00198845	0.00728199
rnp-3	-6.45202	5.17147	-2.16709	-2.16709	-3.09162	-2.68367	0.00199066	0.00728199
C47B2.2	-6.15651	5.07296	-0.689529	-0.689529	-3.08431	-2.67742	0.00204026	0.00741912
acc-2	0.640277	-3.4969	4.97446	0.640277	3.07823	2.6722	0.00208234	0.0075356
famk-1	1.67457	-3.6939	5.07296	1.67457	3.07429	2.66898	0.00211002	0.00760826
C41D11.3	0.394016	-3.34914	4.87595	0.394016	3.06972	2.66504	0.00214257	0.00769784
Y54G9A.9	-5.46698	3.94016	-0.689529	-0.689529	-3.06926	-2.66492	0.00214591	0.00770064
tmbi-4	1.87158	-4.8267	6.45202	1.87158	3.06171	2.65763	0.00220079	0.00786933
gln-3	1.77307	-3.74316	5.61473	1.77307	3.06113	2.65737	0.00220507	0.00787524
ampd-1	-6.55052	5.36847	-0.591025	-0.591025	-3.05242	-2.64877	0.00227008	0.00807857
W02F12.4	-6.15651	4.7282	-0.788033	-0.788033	-3.04907	-2.6462	0.00229552	0.00814015
H06I04.6	1.92083	-4.33418	5.71324	1.92083	3.04313	2.64032	0.0023413	0.0082829
madf-10	1.37906	-5.02371	6.40277	1.37906	3.03474	2.63166	0.00240744	0.00849686
mspn-1	1.32981	-3.64465	6.15651	1.32981	3.03186	2.62882	0.00243048	0.0085681
C17D12.7	-5.76249	4.67894	-1.77307	-1.77307	-3.03027	-2.62743	0.00244333	0.00860327
exl-1	-5.9595	4.7282	-0.640277	-0.640277	-3.02762	-2.62532	0.00246488	0.00865663
tbc-17	-6.058	4.87595	-1.2313	-1.2313	-3.02474	-2.62279	0.00248845	0.00872121
mfap-1	0.886537	-3.6939	4.77745	0.886537	3.02389	2.62223	0.00249547	0.0087356
aagr-3	-6.058	5.07296	-1.08355	-1.08355	-3.0215	-2.62025	0.00251523	0.00878642
col-161	-6.64903	5.66399	-0.591025	-0.591025	-3.02126	-2.62025	0.00251725	0.00878642
oxi-1	-6.55052	5.41773	-1.67457	-1.67457	-3.02108	-2.62025	0.00251877	0.00878642
gakh-1	-5.71324	4.43268	-0.640277	-0.640277	-3.0194	-2.61916	0.00253278	0.00881477
chil-10	-6.59977	5.71324	-0.640277	-0.640277	-3.01752	-2.61744	0.00254849	0.00885919
Y48G9A.9	1.57607	-3.6939	5.86099	1.57607	3.0151	2.6151	0.00256898	0.00892008
eif-3.C	-6.69828	3.29989	-1.47756	-1.47756	-3.01023	-2.61037	0.00261048	0.00904436
C13F10.1	-6.058	3.25064	-1.2313	-1.2313	-3.01019	-2.61037	0.0026108	0.00904436
F31C3.3	1.77307	-3.79241	6.15651	1.77307	3.0082	2.60852	0.00262802	0.00909351
bec-1	-6.10725	5.17147	-0.591025	-0.591025	-3.00209	-2.60283	0.00268129	0.00924581
far-1	-5.56548	2.70886	-0.689529	-0.689529	-3.00105	-2.6024	0.00269052	0.00925726
B0205.13	-6.45202	5.17147	-0.591025	-0.591025	-2.99821	-2.60042	0.00271572	0.00931104
Y60A3A.8	0.344764	-3.74316	4.62969	0.344764	2.99714	2.5996	0.00272528	0.00933316
col-80	-7.04304	6.15651	-2.4626	-2.4626	-2.99212	-2.59474	0.00277049	0.00946637
fbxc-57	-6.25501	5.26997	-0.541773	-0.541773	-2.99064	-2.59346	0.00278393	0.00950146
F25H8.2	-6.89529	5.9595	-1.57607	-1.57607	-2.9856	-2.58857	0.00283026	0.00963765
cca-1	-3.4969	2.01933	-0.738781	-0.738781	-2.98513	-2.58853	0.00283461	0.00963864
F55F10.1	-6.79678	5.81174	-0.541773	-0.541773	-2.98487	-2.58853	0.00283697	0.00963864
algn-11	1.2313	-3.6939	5.86099	1.2313	2.98065	2.58455	0.00287642	0.00975056
nepr-1	-4.97446	2.4626	-0.591025	-0.591025	-2.9779	-2.58263	0.0029023	0.00980507
plst-1	-5.61473	4.13717	-0.541773	-0.541773	-2.97482	-2.58033	0.00293161	0.00987073
ttc-7	0.295512	-3.74316	5.07296	0.295512	2.97322	2.57891	0.00294695	0.00991127
Y73F8A.27	1.62532	-4.58044	5.66399	1.62532	2.96994	2.5756	0.00297862	0.0100066
cri-2	-5.56548	4.38343	-1.72382	-1.72382	-2.96865	-2.57493	0.00299113	0.0100261
emre-1	-7.53556	6.69828	-1.57607	-1.57607	-2.96624	-2.57362	0.00301466	0.0100639
R10D12.8	1.52681	-3.74316	5.56548	1.52681	2.96556	2.57362	0.00302133	0.0100639
nubp-1	1.52681	-4.62969	6.10725	1.52681	2.96544	2.57362	0.00302253	0.0100639
F32E10.9	-5.56548	4.13717	-0.541773	-0.541773	-2.95837	-2.56721	0.00309268	0.010252
vha-14	-5.36847	3.10288	-1.18205	-1.18205	-2.95659	-2.56559	0.00311063	0.0103001
T04H1.2	0.24626	-3.74316	4.8267	0.24626	2.94951	2.55877	0.0031828	0.0105043
dnj-29	-6.30426	3.25064	-1.18205	-1.18205	-2.94885	-2.55848	0.00318963	0.010513
flp-7	1.47756	-5.17147	6.35351	1.47756	2.94572	2.55641	0.00322207	0.0105757
let-858	-6.25501	5.07296	-0.738781	-0.738781	-2.94127	-2.55217	0.00326874	0.0107055
smg-2	-6.25501	5.17147	-0.985041	-0.985041	-2.93708	-2.54839	0.00331322	0.0108222
K07A1.3	-4.03867	2.21634	-0.788033	-0.788033	-2.93689	-2.54839	0.00331519	0.0108222
K07H8.10	-6.30426	5.22072	-0.541773	-0.541773	-2.92717	-2.53897	0.00342065	0.011118
mcrs-1	0.24626	-3.4969	4.97446	0.24626	2.92275	2.53514	0.00346951	0.0112403
W09D10.1	-5.9595	3.64465	-1.18205	-1.18205	-2.92212	-2.5348	0.00347661	0.0112512
snr-3	0.24626	-3.44764	4.33418	0.24626	2.91935	2.53282	0.00350757	0.0113147
pek-1	0.197008	-3.54615	5.17147	0.197008	2.91811	2.53218	0.00352162	0.0113357
dpy-30	-3.98942	2.31485	-0.788033	-0.788033	-2.91759	-2.53197	0.00352752	0.0113425
C30B5.2	1.32981	-6.00875	7.24005	1.32981	2.91295	2.52862	0.00358037	0.0114511
eif-3.L	1.42831	-3.6939	5.07296	1.42831	2.90998	2.52678	0.00361456	0.0115113
elb-1	-6.25501	5.22072	-1.28055	-1.28055	-2.90903	-2.52609	0.00362548	0.0115339
R05F9.6	-6.10725	2.11784	-0.541773	-0.541773	-2.90368	-2.5212	0.00368804	0.0116957
C28H8.3	-4.58044	2.95512	-0.935789	-0.935789	-2.90246	-2.52019	0.0037025	0.0117291
cls-2	-5.36847	2.90587	-0.985041	-0.985041	-2.89582	-2.51385	0.00378167	0.0119421
cct-7	-3.64465	2.11784	-0.689529	-0.689529	-2.89492	-2.51358	0.0037925	0.0119512
R05D7.3	-4.87595	2.80737	-0.935789	-0.935789	-2.89069	-2.5092	0.00384397	0.0121007
F07C3.3	-6.64903	5.66399	-1.1328	-1.1328	-2.88942	-2.50888	0.00385952	0.0121116
Y57G11C.14	-6.058	5.07296	-0.492521	-0.492521	-2.88942	-2.50888	0.00385957	0.0121116
T21B10.3	1.28055	-3.79241	5.9595	1.28055	2.88748	2.50742	0.00388343	0.0121617
bus-19	-5.07296	3.34914	-0.935789	-0.935789	-2.88664	-2.50723	0.0038938	0.0121681
nkb-3	-5.91025	3.15213	-1.03429	-1.03429	-2.88507	-2.50621	0.00391321	0.0122034
mab-23	1.67457	-5.12221	6.25501	1.67457	2.88471	2.50617	0.00391776	0.0122048
vps-50	-6.00875	2.26559	-0.541773	-0.541773	-2.88211	-2.50399	0.00395016	0.0122803
lec-1	-6.84603	5.61473	-1.97008	-1.97008	-2.87638	-2.49828	0.00402264	0.0124798
R02D5.8	-5.46698	4.28493	-1.47756	-1.47756	-2.87382	-2.4959	0.00405544	0.0125637
ser-5	1.18205	-3.39839	5.36847	1.18205	2.87361	2.4959	0.00405806	0.0125637
unc-15	1.32981	-3.74316	5.17147	1.32981	2.86515	2.48715	0.00416812	0.0128771
T04C9.1	-4.23568	2.75811	-0.837285	-0.837285	-2.86484	-2.48715	0.00417218	0.0128771
rps-12	-3.74316	2.16709	-0.689529	-0.689529	-2.864	-2.48657	0.00418323	0.0128979
hid-1	0.591025	-3.54615	5.26997	0.591025	2.86285	2.48565	0.00419844	0.0129315
T02B11.3	-6.15651	2.21634	-0.492521	-0.492521	-2.85808	-2.48127	0.00426219	0.0130914
eif-2Balpha	0.788033	-3.34914	4.53119	0.788033	2.85798	2.48127	0.00426342	0.0130914
T24C12.3	-5.86099	4.77745	-0.492521	-0.492521	-2.85746	-2.48105	0.00427047	0.0130996
F48E3.2	0.295512	-3.74316	5.22072	0.295512	2.85594	2.48006	0.00429091	0.0131361
Y32H12A.8	1.32981	-3.64465	5.81174	1.32981	2.85593	2.48006	0.00429114	0.0131361
idh-2	1.32981	-3.79241	5.51623	1.32981	2.85554	2.47998	0.0042964	0.0131388
apl-1	-3.4969	2.01933	-0.640277	-0.640277	-2.85394	-2.47891	0.00431809	0.0131783
F39H11.1	-6.35351	5.36847	-0.492521	-0.492521	-2.84897	-2.47515	0.00438612	0.0133182
C48D1.1	0.197008	-3.00438	4.62969	0.197008	2.84664	2.47289	0.00441836	0.0134025
rpt-4	-7.68332	5.26997	-2.06859	-2.06859	-2.84613	-2.47269	0.00442536	0.0134102
C39E9.8	-4.03867	2.4626	-0.492521	-0.492521	-2.84548	-2.47252	0.00443447	0.0134165
Y51H4A.25	1.42831	-3.89091	5.17147	1.42831	2.84534	2.47252	0.0044364	0.0134165
D1054.1	-5.41773	3.00438	-1.2313	-1.2313	-2.84322	-2.47086	0.00446604	0.013479
linc-85	-6.74753	5.71324	-0.443268	-0.443268	-2.84045	-2.46811	0.004505	0.0135829
F52B11.5	0.344764	-3.6939	4.92521	0.344764	2.83967	2.46795	0.00451606	0.013589
ncs-7	-3.89091	2.01933	-0.640277	-0.640277	-2.83876	-2.46736	0.00452896	0.0136114
eif-2beta	1.18205	-3.98942	6.64903	1.18205	2.83287	2.46176	0.00461318	0.0138257
mag-1	-6.59977	5.51623	-1.18205	-1.18205	-2.83015	-2.45978	0.0046526	0.0139022
rbbp-5	1.18205	-3.54615	5.46698	1.18205	2.82866	2.45918	0.00467432	0.0139255
pas-2	-6.79678	5.46698	-1.82233	-1.82233	-2.82831	-2.45914	0.00467944	0.0139269
dpy-13	1.32981	-4.28493	5.36847	1.32981	2.82298	2.45352	0.00475793	0.0141465
K07E3.4	1.42831	-3.74316	5.26997	1.42831	2.82047	2.45191	0.00479537	0.01421
C14B9.10	1.03429	-3.25064	5.31922	1.03429	2.8121	2.44345	0.00492194	0.0145476
B0261.1	1.62532	-5.51623	6.74753	1.62532	2.81133	2.44295	0.00493367	0.0145679
fis-2	-5.41773	4.28493	-0.443268	-0.443268	-2.80831	-2.44027	0.0049802	0.0146764
lig-4	-5.22072	4.03867	-1.03429	-1.03429	-2.80719	-2.43937	0.00499753	0.014713
gbas-1	0.344764	-3.4969	5.61473	0.344764	2.80066	2.43239	0.00509985	0.0149995
C01C4.3	1.28055	-4.92521	5.86099	1.28055	2.78925	2.42101	0.00528299	0.0154775
golg-2	1.2313	-5.22072	6.74753	1.2313	2.78589	2.41759	0.00533802	0.0156235
ltd-1	-6.59977	3.84166	-1.47756	-1.47756	-2.78386	-2.41567	0.00537156	0.0157063
C34C6.4	-6.058	4.92521	-1.42831	-1.42831	-2.78287	-2.41523	0.0053881	0.0157252
ceh-21	1.28055	-4.18642	5.76249	1.28055	2.77309	2.40564	0.00555261	0.0161443
rgs-6	1.08355	-5.56548	6.74753	1.08355	2.77037	2.40335	0.00559926	0.0162454
trap-1	1.28055	-4.97446	6.00875	1.28055	2.76159	2.39459	0.00575205	0.0166389
rps-2	-3.94016	2.06859	-0.591025	-0.591025	-2.76099	-2.39459	0.00576262	0.0166389
fipr-17	-5.91025	4.8267	-0.443268	-0.443268	-2.74768	-2.38211	0.00600186	0.0172138
linc-45	1.32981	-4.18642	5.36847	1.32981	2.74414	2.38024	0.006067	0.0173013
hot-4	0.886537	-5.26997	6.30426	0.886537	2.74354	2.37992	0.00607807	0.0173164
dhs-9	1.32981	-4.87595	6.20576	1.32981	2.74199	2.37853	0.00610687	0.017382
C44H9.4	-5.76249	4.77745	-0.394016	-0.394016	-2.73262	-2.36906	0.00628324	0.0178332
F49C12.9	0.738781	-2.4626	5.76249	0.738781	2.73005	2.36723	0.00633239	0.0179219
copz-1	-7.04304	3.6939	-1.03429	-1.03429	-2.7269	-2.36404	0.00639322	0.018077
F41B4.2	1.18205	-4.87595	5.9595	1.18205	2.72435	2.36187	0.0064428	0.0181829
ubc-9	1.1328	-3.44764	5.07296	1.1328	2.71525	2.35305	0.00662253	0.0186201
atgl-1	0.147756	-4.43268	5.36847	0.147756	2.70746	2.3457	0.00677993	0.0189914
mrps-5	-6.20576	5.02371	-0.394016	-0.394016	-2.70274	-2.34179	0.00687704	0.0191917
cts-1	-4.62969	2.51185	-0.788033	-0.788033	-2.70035	-2.33985	0.00692661	0.0192917
cacn-1	-5.41773	3.5954	-0.935789	-0.935789	-2.69838	-2.33912	0.00696773	0.0193292
Y87G2A.13	0.985041	-3.74316	5.71324	0.985041	2.69831	2.33912	0.00696915	0.0193292
dpf-7	-5.61473	4.38343	-0.394016	-0.394016	-2.69821	-2.33912	0.00697141	0.0193292
B0250.4	0.985041	-4.7282	6.40277	0.985041	2.6961	2.33738	0.00701559	0.0194196
tag-175	-5.71324	4.7282	-0.837285	-0.837285	-2.69449	-2.33632	0.00704973	0.0194744
col-60	-6.25501	5.31922	-0.394016	-0.394016	-2.68856	-2.3307	0.00717616	0.019769
ttr-15	-7.38781	6.25501	-0.788033	-0.788033	-2.68408	-2.32637	0.00727295	0.019999
F38A1.8	-6.45202	5.36847	-0.541773	-0.541773	-2.67944	-2.32153	0.0073746	0.0202581
csn-1	-5.17147	4.18642	-0.394016	-0.394016	-2.67916	-2.32153	0.0073807	0.0202581
col-181	-7.33856	4.62969	-1.18205	-1.18205	-2.67684	-2.31996	0.00743195	0.0203429
kat-1	-5.91025	4.7282	-1.28055	-1.28055	-2.67684	-2.31996	0.00743195	0.0203429
jhdm-1	1.57607	-6.40277	7.58482	1.57607	2.67524	2.31919	0.0074676	0.0203847
bath-36	-5.61473	4.43268	-0.344764	-0.344764	-2.66923	-2.3134	0.00760262	0.0207005
T23G7.2	-6.35351	5.26997	-0.935789	-0.935789	-2.66917	-2.3134	0.00760397	0.0207005
nhr-71	0.985041	-5.81174	6.89529	0.985041	2.66602	2.31052	0.00767556	0.0208591
sek-1	0.985041	-6.20576	7.48631	0.985041	2.66599	2.31052	0.00767616	0.0208591
unc-64	-6.59977	4.08792	-1.2313	-1.2313	-2.66434	-2.30936	0.00771389	0.0209237
T23G11.4	1.03429	-4.43268	6.30426	1.03429	2.65875	2.30371	0.00784322	0.0212389
usp-5	0.886537	-4.77745	5.91025	0.886537	2.6584	2.30371	0.00785133	0.0212389
Y94H6A.10	-4.23568	2.01933	-0.591025	-0.591025	-2.65106	-2.29688	0.00802388	0.0216256
Y43B11AR.3	0.344764	-3.74316	5.22072	0.344764	2.65083	2.29688	0.00802951	0.0216256
C35D10.1	1.08355	-6.058	7.14155	1.08355	2.64834	2.29447	0.00808875	0.0217635
col-106	-6.89529	5.86099	-0.985041	-0.985041	-2.64737	-2.29372	0.00811198	0.0218064
tank-1	-6.15651	4.67894	-0.591025	-0.591025	-2.64546	-2.29225	0.0081581	0.0218911
C44H4.8	0.886537	-3.94016	5.81174	0.886537	2.64405	2.29102	0.00819194	0.0219623
timm-17B.1	0.394016	-4.28493	5.61473	0.394016	2.64339	2.29061	0.00820815	0.0219861
C14F11.4	0.788033	-3.6939	5.81174	0.788033	2.63442	2.28123	0.00842811	0.022535
sdc-2	-6.69828	5.66399	-0.344764	-0.344764	-2.63404	-2.28114	0.00843758	0.0225403
hil-2	0.689529	-2.3641	7.33856	0.689529	2.63338	2.28107	0.00845402	0.022544
fipr-11	1.08355	-3.6939	6.10725	1.08355	2.63133	2.27912	0.00850506	0.02266
tbc-16	0.738781	-2.95512	6.35351	0.738781	2.63075	2.2788	0.00851968	0.0226788
Y54H5A.1	-5.71324	4.67894	-0.344764	-0.344764	-2.62806	-2.27646	0.00858741	0.0228186
R186.8	0.935789	-5.02371	6.25501	0.935789	2.62736	2.27618	0.00860497	0.0228354
B0507.9	-6.99379	6.20576	-1.18205	-1.18205	-2.6272	-2.27618	0.00860895	0.0228354
F22E5.6	-6.10725	4.97446	-1.08355	-1.08355	-2.62582	-2.27496	0.00864412	0.0229085
F53A10.2	-6.00875	4.92521	-0.344764	-0.344764	-2.62351	-2.27334	0.00870279	0.0230058
Y39B6A.33	-6.79678	5.81174	-1.28055	-1.28055	-2.62347	-2.27334	0.00870384	0.0230058
B0365.9	1.32981	-4.53119	6.25501	1.32981	2.62276	2.27292	0.00872214	0.0230312
best-23	0.197008	-2.85662	4.18642	0.197008	2.62216	2.27292	0.00873731	0.0230312
set-20	-6.15651	2.51185	-1.1328	-1.1328	-2.6216	-2.27292	0.00875186	0.0230312
lpd-9	1.18205	-4.43268	7.04304	1.18205	2.61867	2.26997	0.00882742	0.0232097
F36A2.7	-4.97446	2.70886	-0.689529	-0.689529	-2.61727	-2.26874	0.0088635	0.0232841
R01H10.7	-6.55052	5.46698	-0.344764	-0.344764	-2.61214	-2.26432	0.00899784	0.0235546
npr-21	-6.10725	3.05363	-0.886537	-0.886537	-2.60697	-2.25888	0.00913475	0.0238909
R11F4.1	-4.8267	3.39839	-0.344764	-0.344764	-2.6056	-2.25799	0.00917136	0.0239461
sql-1	1.28055	-3.5954	6.50127	1.28055	2.59938	2.25169	0.00933918	0.0243419
sms-3	1.2313	-3.74316	6.058	1.2313	2.59589	2.24844	0.00943462	0.024548
F20B6.4	-5.36847	4.38343	-0.295512	-0.295512	-2.59296	-2.24549	0.00951541	0.0247368
mboa-6	-6.64903	5.61473	-0.443268	-0.443268	-2.59204	-2.2448	0.00954073	0.0247811
C26B2.7	0.837285	-5.41773	6.94454	0.837285	2.58929	2.24238	0.00961731	0.0249369
B0261.7	0.738781	-2.80737	6.89529	0.738781	2.58736	2.24055	0.00967132	0.0250552
dyf-7	-6.35351	5.31922	-0.295512	-0.295512	-2.58545	-2.23941	0.0097251	0.0251295
M02B7.2	-6.35351	5.26997	-0.295512	-0.295512	-2.58343	-2.23747	0.00978224	0.0252553
rpb-10	0.147756	-2.51185	5.26997	0.147756	2.58221	2.23644	0.00981691	0.0253231
mcm-10	0.344764	-3.74316	5.12221	0.344764	2.58159	2.23607	0.00983468	0.0253471
C35A5.8	0.935789	-3.6939	5.56548	0.935789	2.58015	2.23479	0.00987568	0.0254309
tbb-6	-5.86099	4.77745	-0.295512	-0.295512	-2.57534	-2.23039	0.0100143	0.0257216
nhr-256	-6.69828	5.56548	-0.738781	-0.738781	-2.57349	-2.22865	0.0100678	0.0258369
K11G12.6	-6.20576	5.02371	-0.295512	-0.295512	-2.57264	-2.22803	0.0100927	0.0258788
mdh-1	0.738781	-5.12221	6.64903	0.738781	2.57221	2.22788	0.0101051	0.0258885
lec-4	-4.23568	2.11784	-0.541773	-0.541773	-2.56891	-2.22517	0.010202	0.0260698
Y76B12C.3	0.837285	-5.22072	6.45202	0.837285	2.56497	2.22115	0.0103183	0.0263408
rei-2	-5.17147	4.03867	-0.295512	-0.295512	-2.56473	-2.22115	0.0103256	0.0263408
H01G02.3	-3.94016	2.26559	-0.640277	-0.640277	-2.5629	-2.21976	0.0103801	0.026435
sucl-1	-4.03867	2.11784	-0.541773	-0.541773	-2.56005	-2.217	0.0104656	0.0266232
gpcp-1	0.689529	-3.10288	6.10725	0.689529	2.55973	2.217	0.0104753	0.0266232
atp-2	-4.08792	2.65961	-0.591025	-0.591025	-2.55955	-2.217	0.0104807	0.0266232
ced-7	-6.59977	4.03867	-1.28055	-1.28055	-2.55688	-2.21433	0.0105615	0.0268059
ccar-1	-4.38343	2.41335	-0.591025	-0.591025	-2.55431	-2.21178	0.0106397	0.0269816
taf-1	-5.31922	3.98942	-0.295512	-0.295512	-2.54585	-2.20296	0.0109011	0.0275977
F07F6.2	0.738781	-3.74316	5.12221	0.738781	2.53896	2.19577	0.0111183	0.0281083
C34B7.2	0.24626	-3.25064	4.62969	0.24626	2.53886	2.19577	0.0111215	0.0281083
ccdc-55	-6.69828	5.46698	-1.18205	-1.18205	-2.53599	-2.19289	0.0112129	0.0283155
tat-5	-6.64903	5.61473	-1.03429	-1.03429	-2.53307	-2.19027	0.0113069	0.0285047
grp-1	-6.74753	5.76249	-0.738781	-0.738781	-2.53205	-2.18946	0.0113398	0.0285638
lst-4	-5.76249	4.7282	-0.394016	-0.394016	-2.53148	-2.18915	0.0113582	0.0285862
Y39A1C.1	-6.89529	5.9595	-0.689529	-0.689529	-2.53096	-2.18889	0.0113751	0.0286046
glr-7	0.689529	-3.6939	5.86099	0.689529	2.52565	2.1836	0.0115484	0.0289917
ubc-22	0.738781	-3.84166	6.55052	0.738781	2.52314	2.18111	0.0116312	0.0291754
hrpf-1	-7.24005	6.45202	-1.72382	-1.72382	-2.52249	-2.18072	0.0116526	0.0292044
Y43F8C.7	0.935789	-3.74316	5.61473	0.935789	2.52206	2.18056	0.0116668	0.0292158
linc-91	0.886537	-3.79241	5.76249	0.886537	2.51061	2.16869	0.0120524	0.030106
drh-1	-5.81174	4.58044	-0.886537	-0.886537	-2.51026	-2.16863	0.0120643	0.0301105
moc-1	0.541773	-3.4969	6.15651	0.541773	2.50884	2.16752	0.0121129	0.0301951
C06B3.6	-5.66399	4.58044	-0.24626	-0.24626	-2.50868	-2.16752	0.0121183	0.0301951
sri-69	0.640277	-2.90587	6.35351	0.640277	2.50701	2.16598	0.0121756	0.0303128
gtf-2F1	-6.94454	5.71324	-0.24626	-0.24626	-2.50609	-2.16528	0.0122073	0.0303664
ubc-3	0.738781	-3.44764	5.81174	0.738781	2.50477	2.16412	0.0122531	0.0304551
baf-1	0.147756	-3.4969	5.17147	0.147756	2.50377	2.16333	0.0122877	0.0305159
fkb-3	0.935789	-5.9595	7.0923	0.935789	2.5026	2.16234	0.0123285	0.0305919
Y17G7B.20	-6.35351	5.17147	-1.03429	-1.03429	-2.49773	-2.15721	0.0124991	0.0309895
tag-115	0.394016	-3.15213	4.87595	0.394016	2.49568	2.15523	0.0125717	0.0311438
F27C1.6	0.344764	-4.43268	5.51623	0.344764	2.48727	2.14645	0.0128728	0.0318371
lec-6	0.985041	-3.44764	5.17147	0.985041	2.48623	2.14561	0.0129104	0.0319038
mafr-1	1.1328	-5.61473	6.55052	1.1328	2.48184	2.14134	0.0130707	0.0322469
C09G9.1	-6.55052	5.56548	-0.394016	-0.394016	-2.48033	-2.1403	0.0131262	0.0323306
jmjd-3.1	-4.97446	3.39839	-0.344764	-0.344764	-2.47676	-2.13728	0.013258	0.032575
Y37E3.17	-4.53119	2.65961	-0.640277	-0.640277	-2.47582	-2.13655	0.0132931	0.0326343
C33D9.6	0.689529	-3.74316	5.61473	0.689529	2.47227	2.13289	0.0134259	0.0329336
K04A8.2	-5.17147	2.56111	-0.24626	-0.24626	-2.46919	-2.1301	0.0135418	0.0331635
F53H1.1	1.1328	-4.03867	5.86099	1.1328	2.4685	2.12997	0.0135682	0.033174
K04G7.1	-6.45202	5.12221	-0.24626	-0.24626	-2.46728	-2.12893	0.0136143	0.0332597
T08G11.1	-3.98942	2.31485	-0.443268	-0.443268	-2.46328	-2.12608	0.0137671	0.0334965
T23G11.7	-7.0923	5.9595	-0.24626	-0.24626	-2.46199	-2.12495	0.0138169	0.0335906
memb-2	0.492521	-6.25501	7.1908	0.492521	2.45866	2.12154	0.0139458	0.0338765
C01F6.9	-6.94454	4.28493	-0.788033	-0.788033	-2.45782	-2.12093	0.0139782	0.0339278
sod-1	-6.74753	5.61473	-0.344764	-0.344764	-2.45555	-2.1187	0.0140669	0.0341155
otub-2	-6.74753	5.61473	-1.18205	-1.18205	-2.44902	-2.11268	0.0143245	0.0346282
scd-1	-4.18642	2.06859	-0.443268	-0.443268	-2.44657	-2.11059	0.0144221	0.034808
T22C1.6	-6.64903	5.31922	-1.2313	-1.2313	-2.44401	-2.10804	0.0145249	0.0350278
zmp-5	0.147756	-3.44764	5.12221	0.147756	2.44197	2.10639	0.0146075	0.0351705
ubh-2	-5.41773	4.03867	-0.788033	-0.788033	-2.4409	-2.10552	0.0146507	0.0352462
F49E2.2	0.591025	-5.36847	6.55052	0.591025	2.43883	2.10384	0.0147351	0.0353925
swsn-2.2	0.0492521	-3.4969	5.07296	0.0492521	2.43496	2.09983	0.0148934	0.0357442
spsb-1	-7.68332	6.94454	-1.28055	-1.28055	-2.43442	-2.09954	0.0149158	0.0357694
rsp-4	0.541773	-2.90587	6.10725	0.541773	2.42598	2.09072	0.0152671	0.0365533
prmt-7	0.492521	-5.41773	6.69828	0.492521	2.42364	2.08841	0.015366	0.0367608
gck-3	0.295512	-3.74316	5.61473	0.295512	2.42146	2.0863	0.0154581	0.0369517
C01A2.4	-6.50127	5.07296	-0.591025	-0.591025	-2.41845	-2.08324	0.0155866	0.0372292
B0554.4	-6.64903	5.71324	-1.18205	-1.18205	-2.41736	-2.08234	0.0156334	0.0373112
cec-8	0.295512	-3.20138	5.61473	0.295512	2.40658	2.0712	0.0161027	0.0383398
lin-49	1.1328	-5.9595	7.58482	1.1328	2.40489	2.06963	0.0161774	0.038487
col-117	-6.84603	5.91025	-0.197008	-0.197008	-2.40306	-2.0679	0.0162584	0.0386492
C05E11.3	0.344764	-3.6939	4.92521	0.344764	2.39895	2.06361	0.0164421	0.039055
nhr-4	0.147756	-4.18642	5.41773	0.147756	2.3985	2.06343	0.0164624	0.0390721
ccdc-47	0.788033	-6.10725	7.1908	0.788033	2.39222	2.05691	0.0167467	0.0396951
F32D8.14	-6.058	2.75811	-0.492521	-0.492521	-2.39212	-2.05691	0.0167513	0.0396951
obr-2	0.591025	-4.53119	5.86099	0.591025	2.38875	2.05377	0.016906	0.0399983
cpsf-4	0.886537	-4.53119	6.30426	0.886537	2.38611	2.05145	0.0170277	0.0402229
acs-4	0.443268	-2.26559	7.48631	0.443268	2.38153	2.04663	0.0172409	0.0406944
ech-6	0.147756	-3.74316	5.31922	0.147756	2.38052	2.04582	0.0172882	0.0407739
strl-1	0.295512	-3.74316	5.41773	0.295512	2.37561	2.04062	0.0175202	0.0412887
mog-5	0.788033	-4.48194	5.76249	0.788033	2.37274	2.03772	0.0176566	0.0415775
rsp-5	0.394016	-2.51185	6.00875	0.394016	2.3714	2.03654	0.017721	0.0416964
alh-9	-5.9595	2.85662	-0.591025	-0.591025	-2.35834	-2.02315	0.0183571	0.043058
rad-8	0.344764	-2.26559	5.22072	0.344764	2.356	2.02084	0.018473	0.0432961
B0454.6	0.492521	-3.6939	4.77745	0.492521	2.35395	2.01919	0.0185753	0.0434679
F32H5.1	-5.91025	4.7282	-0.541773	-0.541773	-2.34691	-2.012	0.0189296	0.0442197
C06E4.2	0.394016	-5.41773	6.74753	0.394016	2.34563	2.01114	0.0189947	0.0443112
gas-1	0.443268	-2.90587	7.0923	0.443268	2.33375	1.99873	0.0196088	0.0456372
Y106G6H.8	0.541773	-3.79241	5.46698	0.541773	2.33237	1.99751	0.0196812	0.0457702
spds-1	0.443268	-2.90587	6.79678	0.443268	2.32852	1.99414	0.0198847	0.0461363
W03C9.5	-5.56548	4.18642	-0.197008	-0.197008	-2.315	-1.98055	0.0206128	0.0476413
K02B12.7	0.443268	-6.20576	7.53556	0.443268	2.30976	1.97627	0.0209017	0.0481237
nrx-1	0.344764	-6.00875	7.04304	0.344764	2.30889	1.97563	0.0209496	0.0481969
ZK546.14	-5.71324	4.67894	-0.591025	-0.591025	-2.30695	-1.97377	0.0210576	0.0484084
B0511.6	0.443268	-4.48194	5.66399	0.443268	2.30644	1.97352	0.0210862	0.0484368
tomm-20	0.541773	-3.39839	5.02371	0.541773	2.30579	1.97344	0.0211222	0.0484454
F38G1.3	-5.12221	2.85662	-0.443268	-0.443268	-2.30527	-1.97318	0.0211512	0.0484749
F31E3.2	0.591025	-3.74316	6.058	0.591025	2.30483	1.97301	0.0211761	0.0484949
Y17D7B.2	-6.99379	6.00875	-0.24626	-0.24626	-2.30404	-1.97244	0.0212206	0.0485596
coa-6	0.738781	-4.67894	6.40277	0.738781	2.30318	1.9718	0.0212688	0.048633
col-119	-6.15651	3.54615	-0.788033	-0.788033	-2.29675	-1.96585	0.0216332	0.0493159
kgb-1	3.9902	-6.00993	7.09369	3.9902	5.7456	4.91449	9.15951e-09	8.90138e-07
Y57G11C.33	-7.58631	6.60107	-3.15275	-3.15275	-4.78112	-4.15913	1.74325e-06	3.19464e-05
dpy-19	1.57638	-3.69463	6.10845	1.57638	4.66725	4.05459	3.05254e-06	5.02214e-05
unc-33	-5.271	3.44832	-1.77342	-1.77342	-4.03158	-3.47515	5.54037e-05	0.000510573
rab-8	-6.40402	5.0247	-1.92121	-1.92121	-4.00302	-3.45092	6.25389e-05	0.00055867
sli-1	-5.32027	4.33503	-1.6749	-1.6749	-3.82203	-3.29547	0.000132356	0.000982559
lin-41	-5.46805	2.9557	-1.6749	-1.6749	-3.80895	-3.28316	0.000139556	0.00102651
hst-3.1	-5.91141	4.92617	-1.6749	-1.6749	-3.70994	-3.1903	0.000207305	0.00142125
math-33	-4.92617	3.15275	-1.47785	-1.47785	-3.65776	-3.14123	0.000254433	0.0016824
daf-18	0.246309	-3.64537	4.53208	0.246309	3.61414	3.10095	0.000301347	0.00192898
abts-1	-5.6651	3.39906	-1.52711	-1.52711	-3.52589	-3.02254	0.000422067	0.00250661
mtm-6	-6.55181	5.51731	-1.62564	-1.62564	-3.50232	-3.00338	0.00046123	0.00266997
rrf-1	-7.58631	6.74886	-0.886711	-0.886711	-3.41412	-2.9251	0.000639893	0.00344347
dnj-23	-6.50255	5.32027	-2.06899	-2.06899	-3.25427	-2.77838	0.00113685	0.00546308
ccpp-1	-6.10845	5.12322	-0.689664	-0.689664	-3.09997	-2.64464	0.00193541	0.0081777
gcn-2	-5.81288	4.82765	-1.18228	-1.18228	-3.07926	-2.62823	0.00207517	0.00858299
syd-2	-6.99517	5.86215	-0.837449	-0.837449	-3.05003	-2.60167	0.00228821	0.00927723
dpy-22	-3.9902	2.26604	-0.788188	-0.788188	-3.02703	-2.58304	0.00246969	0.00979335
nex-2	-5.32027	4.18725	-0.492617	-0.492617	-2.85587	-2.4384	0.00429191	0.0147526
par-2	1.52711	-4.38429	5.71436	1.52711	2.84679	2.43039	0.00441618	0.0150827
prmt-5	0.344832	-3.64537	5.96067	0.344832	2.79585	2.3872	0.00517637	0.0169773
cam-1	-6.10845	4.92617	-1.33007	-1.33007	-2.67783	-2.28951	0.00741004	0.0220498
unc-71	1.2808	-4.92617	6.25624	1.2808	2.57502	2.19965	0.0100235	0.0278315
rpy-1	-6.20698	2.51235	-0.689664	-0.689664	-2.57459	-2.19951	0.0100358	0.0278415
ced-3	-5.56658	4.23651	-0.935973	-0.935973	-2.53021	-2.16025	0.0113995	0.0307531
msi-1	-6.35476	5.271	-1.13302	-1.13302	-2.46824	-2.10307	0.0135778	0.0354592
unc-26	-5.22174	3.9902	-0.344832	-0.344832	-2.46689	-2.10216	0.0136291	0.0355396
pmk-3	-4.23651	2.51235	-0.246309	-0.246309	-2.41064	-2.04935	0.0159247	0.0404282
lim-9	-3.64537	2.16752	-0.394094	-0.394094	-2.41042	-2.04935	0.0159343	0.0404282
unc-116	0.147785	-3.3498	5.17248	0.147785	2.36268	2.004	0.0181434	0.0450703
mle: log2 fold expression difference value, reported as maximum likelihood estimate lb, ub: 95% lower bound (lb) and upper bound (ub) of the log2 fold expression difference value ce: conservative estiamte of the log2 fold expression difference Z: statistical significance of the expression differences, expressed as a signed Z score cZ: Z score adjusted for multiple hypothesis testing p.values: P v…

## Sheet: dlk-1(0) axotomy vs. uninjured
axotomized vs. uninjured neurons from dlk-1(0) animals; mle>0 means upregulated in axotomized neurons
gene name	lb	mle	ub	ce	Z	cZ	p.values	p.values.adj
flp-8	6.43005	-8.60563	9.28247	6.43005	5.84841	4.41878	4.96287e-09	9.92574e-06
Y37B11A.8	5.55982	-7.05855	7.88043	5.55982	4.60181	2.98672	4.18833e-06	0.00281987
rpn-7	5.46312	-7.25193	8.17051	5.46312	4.57451	2.98672	4.77336e-06	0.00281987
dod-24	5.31808	-7.10689	8.02547	5.31808	4.50464	2.98672	6.64849e-06	0.00281987
F41E6.12	4.59289	-7.44532	8.2672	4.59289	4.40634	2.98672	1.05132e-05	0.00281987
T05E11.8	5.17305	-7.10689	8.12217	5.17305	4.37725	2.98672	1.20184e-05	0.00281987
madf-11	4.59289	-7.10689	7.97713	4.59289	4.37423	2.98672	1.2186e-05	0.00281987
C28H8.5	5.17305	-6.72012	7.59036	5.17305	4.36703	2.98672	1.25945e-05	0.00281987
memb-2	4.88297	-6.91351	7.97713	4.88297	4.35314	2.98672	1.34203e-05	0.00281987
yars-2	5.07635	-6.81682	7.88043	5.07635	4.34231	2.98672	1.40993e-05	0.00281987
C49F5.7	-9.76594	8.46059	-3.19085	-3.19085	-4.2844	-2.96087	1.8323e-05	0.00306776
B0507.3	4.78628	-6.33335	7.54201	4.78628	4.25913	2.96087	2.05225e-05	0.00306776
T04B2.3	4.83462	-6.86516	7.7354	4.83462	4.2522	2.96087	2.11681e-05	0.00306776
cebp-2	4.68958	-6.52674	7.39697	4.68958	4.24898	2.96087	2.14743e-05	0.00306776
btbd-10	4.78628	-6.3817	7.54201	4.78628	4.20149	2.93163	2.65168e-05	0.00337183
chn-1	4.64124	-6.72012	7.6387	4.64124	4.19761	2.93163	2.69747e-05	0.00337183
atg-7	4.64124	-6.67178	7.78374	4.64124	4.16328	2.90833	3.13711e-05	0.00363364
cux-7	3.72266	-7.05855	7.97713	3.72266	4.13599	2.90833	3.53432e-05	0.00363364
ule-4	4.68958	-6.33335	7.30028	4.68958	4.13352	2.90833	3.57252e-05	0.00363364
ard-1	4.64124	-6.33335	7.54201	4.64124	4.11977	2.90833	3.79243e-05	0.00363364
ikke-1	3.77101	-6.81682	7.78374	3.77101	4.10714	2.90833	4.00589e-05	0.00363364
F41E6.17	4.01274	-7.10689	8.02547	4.01274	4.10628	2.90833	4.02079e-05	0.00363364
tag-322	4.59289	-6.18832	7.25193	4.59289	4.09737	2.90833	4.17868e-05	0.00363364
W07E6.5	4.30281	-6.47839	7.54201	4.30281	4.08652	2.907	4.3789e-05	0.00364909
rnp-7	4.64124	-6.52674	7.54201	4.64124	4.05997	2.8936	4.90796e-05	0.00380852
F22E5.13	4.54454	-6.67178	7.49366	4.54454	4.05304	2.8936	5.05561e-05	0.00380852
F54D5.7	4.35116	-6.13997	7.15524	4.35116	4.0392	2.8936	5.3633e-05	0.00380852
ham-1	3.96439	-7.0102	8.02547	3.96439	4.03549	2.8936	5.4489e-05	0.00380852
nepr-1	-9.33082	7.92878	-3.09416	-3.09416	-4.02556	-2.8936	5.68394e-05	0.00380852
pxd-1	4.35116	-6.04328	6.96186	4.35116	4.02437	2.8936	5.71278e-05	0.00380852
prcc-1	3.72266	-6.57509	7.92878	3.72266	4.00222	2.87437	6.27499e-05	0.00404838
ZK384.7	4.30281	-6.04328	7.30028	4.30281	3.98781	2.87095	6.66868e-05	0.00409238
snpc-3.4	4.35116	-6.43005	7.39697	4.35116	3.98484	2.87095	6.75243e-05	0.00409238
srb-5	4.30281	-5.94659	6.91351	4.30281	3.96074	2.84831	7.47191e-05	0.00439524
spd-1	4.20612	-7.0102	7.88043	4.20612	3.93375	2.82603	8.363e-05	0.00471293
R12E2.11	4.15778	-5.99493	7.20359	4.15778	3.91695	2.82603	8.96773e-05	0.00471293
C50D2.2	4.15778	-5.99493	7.10689	4.15778	3.91573	2.82603	9.01292e-05	0.00471293
sur-7	4.20612	-6.23666	7.39697	4.20612	3.90881	2.82603	9.27504e-05	0.00471293
F53F4.4	4.01274	-6.23666	7.44532	4.01274	3.90353	2.82603	9.48015e-05	0.00471293
C50D2.5	-9.13744	8.17051	-2.41731	-2.41731	-3.89767	-2.82603	9.71227e-05	0.00471293
D1086.10	4.15778	-5.84989	6.86516	4.15778	3.89366	2.82603	9.87429e-05	0.00471293
mut-15	3.96439	-5.94659	7.10689	3.96439	3.89208	2.82603	9.93894e-05	0.00471293
nlp-9	4.10943	-5.84989	7.10689	4.10943	3.88739	2.82603	0.000101328	0.00471293
cutl-19	4.10943	-5.7532	6.67178	4.10943	3.86855	2.8213	0.000109483	0.00478298
idhg-1	-8.21886	5.99493	-3.91604	-3.91604	-3.8619	-2.8213	0.000112509	0.00478298
dmsr-5	4.10943	-6.52674	7.54201	4.10943	3.85955	2.8213	0.000113595	0.00478298
glb-13	4.10943	-5.89824	7.0102	4.10943	3.8563	2.8213	0.000115115	0.00478298
C06E4.2	4.10943	-6.18832	7.34863	4.10943	3.85274	2.8213	0.000116802	0.00478298
npp-10	3.96439	-6.04328	7.10689	3.96439	3.85147	2.8213	0.00011741	0.00478298
npp-7	4.10943	-5.84989	6.91351	4.10943	3.847	2.8213	0.000119575	0.00478298
lntl-1	4.06108	-5.80155	6.76847	4.06108	3.84131	2.82021	0.000122381	0.00479927
ife-1	3.8677	-7.0102	7.88043	3.8677	3.83445	2.81747	0.000125848	0.00484031
dhs-31	3.91604	-5.70485	6.67178	3.91604	3.81587	2.79933	0.000135704	0.00512089
atln-1	3.81935	-6.04328	7.20359	3.81935	3.78975	2.78219	0.000150801	0.0053993
marb-1	3.81935	-6.62343	7.59036	3.81935	3.78514	2.78219	0.00015362	0.0053993
F15G9.6	-8.8957	7.92878	-2.03054	-2.03054	-3.78365	-2.78219	0.000154547	0.0053993
cdk-12	3.8677	-5.84989	6.91351	3.8677	3.78039	2.78219	0.00015658	0.0053993
cal-2	-7.49366	4.54454	-2.6107	-2.6107	-3.77006	-2.77908	0.000163207	0.00545125
col-80	-9.52421	8.2672	-2.36896	-2.36896	-3.76672	-2.77908	0.000165404	0.00545125
R09B3.6	3.8677	-5.60816	6.86516	3.8677	3.76525	2.77908	0.000166384	0.00545125
aly-3	3.77101	-5.94659	7.15524	3.77101	3.76113	2.77908	0.00016915	0.00545125
mspn-1	3.8677	-5.60816	6.81682	3.8677	3.75436	2.77908	0.000173783	0.00545125
vha-1	3.8677	-5.55982	6.72012	3.8677	3.75149	2.77908	0.000175783	0.00545125
din-1	2.85243	-5.36643	6.62343	2.85243	3.74953	2.77908	0.000177166	0.00545125
zyx-1	-3.91604	2.514	-1.257	-1.257	-3.74319	-2.77583	0.0001817	0.00550607
linc-50	3.77101	-5.60816	6.72012	3.77101	3.72905	2.76657	0.0001922	0.00566494
eif-3.B	3.96439	-5.89824	7.10689	3.96439	3.72842	2.76657	0.000192684	0.00566494
tsp-6	3.77101	-5.70485	6.86516	3.77101	3.72484	2.76657	0.00019544	0.00566494
C11E4.6	3.67431	-5.51147	6.62343	3.67431	3.70279	2.74424	0.000213241	0.00606513
scbp-2	3.43258	-6.04328	7.0102	3.43258	3.70034	2.74424	0.000215312	0.00606513
C45E1.4	-5.31808	3.1425	-1.49873	-1.49873	-3.68303	-2.72644	0.000230481	0.00640226
T16G12.3	3.62597	-5.60816	6.72012	3.62597	3.6736	2.72269	0.00023916	0.0064753
papl-1	3.67431	-5.46312	6.47839	3.67431	3.66849	2.72269	0.000243986	0.0064753
apl-1	-5.46312	3.57762	-1.83716	-1.83716	-3.66794	-2.72269	0.000244509	0.0064753
aars-1	3.72266	-5.55982	6.57509	3.72266	3.66632	2.72269	0.000246061	0.0064753
ZK632.4	3.67431	-5.60816	6.76847	3.67431	3.65906	2.71763	0.000253139	0.00657505
ZC13.2	3.57762	-5.55982	6.67178	3.57762	3.65101	2.71151	0.000261214	0.0066978
vha-15	3.72266	-5.46312	6.62343	3.72266	3.64459	2.70745	0.000267821	0.00678028
T04B2.1	3.52927	-5.51147	6.57509	3.52927	3.6316	2.69515	0.000281671	0.00703578
F29B9.5	3.52927	-5.70485	6.72012	3.52927	3.62198	2.69515	0.000292359	0.00703578
icln-1	3.43258	-5.70485	6.91351	3.43258	3.61789	2.69515	0.000297011	0.00703578
vps-45	3.04581	-5.46312	6.57509	3.04581	3.61061	2.69515	0.000305482	0.00703578
F27D4.4	-9.08909	7.92878	-1.78881	-1.78881	-3.60989	-2.69515	0.00030633	0.00703578
mlt-2	3.33589	-6.09162	7.15524	3.33589	3.60931	2.69515	0.000307013	0.00703578
F39E9.10	2.99747	-5.99493	7.34863	2.99747	3.60892	2.69515	0.000307478	0.00703578
linc-10	3.48093	-5.65651	6.81682	3.48093	3.60626	2.69515	0.000310639	0.00703578
C31E10.6	3.52927	-5.36643	6.52674	3.52927	3.60187	2.69515	0.000315935	0.00703578
C14F11.6	3.57762	-5.41478	6.62343	3.57762	3.59956	2.69515	0.000318761	0.00703578
phf-34	3.52927	-5.31808	6.47839	3.52927	3.59844	2.69515	0.000320128	0.00703578
C08F11.12	3.62597	-5.26974	6.28501	3.62597	3.59407	2.69374	0.000325551	0.00706554
rde-12	3.67431	-5.7532	6.81682	3.67431	3.59168	2.69374	0.000328548	0.00706554
mlck-1	-4.73793	2.70739	-1.257	-1.257	-3.58785	-2.69286	0.000333412	0.00708417
Y17G9B.5	3.43258	-5.26974	6.43005	3.43258	3.58533	2.69286	0.000336654	0.00708417
M03A1.8	3.48093	-5.31808	6.3817	3.48093	3.58272	2.69286	0.00034004	0.00708417
Y71F9AL.9	3.52927	-5.36643	6.43005	3.52927	3.5775	2.68966	0.000346894	0.00715245
F37F2.2	3.48093	-5.7532	7.05855	3.48093	3.57177	2.68577	0.000354581	0.00723635
F53F4.13	-8.65397	7.68705	-1.74046	-1.74046	-3.56401	-2.68241	0.000365239	0.0073093
bet-2	3.38424	-5.36643	6.72012	3.38424	3.55786	2.68241	0.000373884	0.0073093
unc-108	-4.15778	2.41731	-1.06362	-1.06362	-3.55541	-2.68241	0.000377387	0.0073093
kup-1	3.38424	-5.26974	6.43005	3.38424	3.5532	2.68241	0.00038058	0.0073093
D2030.11	3.43258	-5.31808	6.81682	3.43258	3.54952	2.68241	0.000385934	0.0073093
atgp-2	3.48093	-5.94659	7.20359	3.48093	3.54438	2.68241	0.000393533	0.0073093
F28E10.1	3.19085	-5.46312	6.47839	3.19085	3.5431	2.68241	0.000395451	0.0073093
F44E2.10	3.19085	-5.70485	7.05855	3.19085	3.53857	2.68241	0.000402307	0.0073093
die-1	3.43258	-5.1247	6.28501	3.43258	3.53596	2.68241	0.00040629	0.0073093
sucl-1	-5.31808	3.52927	-2.07889	-2.07889	-3.53551	-2.68241	0.000406983	0.0073093
K07C5.6	3.48093	-5.51147	6.96186	3.48093	3.53541	2.68241	0.000407141	0.0073093
col-122	-9.04074	7.78374	-1.78881	-1.78881	-3.53458	-2.68241	0.00040842	0.0073093
T26E3.10	3.2392	-5.7532	6.86516	3.2392	3.53453	2.68241	0.000408494	0.0073093
ZK1128.1	3.33589	-5.41478	6.72012	3.33589	3.53328	2.68241	0.000410432	0.0073093
ostd-1	3.28754	-5.17305	6.43005	3.28754	3.53163	2.68241	0.000413013	0.0073093
pat-6	3.38424	-5.31808	6.43005	3.38424	3.52348	2.68241	0.000425922	0.0073093
nlp-55	3.38424	-5.1247	6.23666	3.38424	3.52221	2.68241	0.000427973	0.0073093
arrd-25	3.28754	-5.22139	6.28501	3.28754	3.51946	2.68241	0.000432429	0.0073093
C35C5.8	3.28754	-5.26974	6.57509	3.28754	3.51618	2.68241	0.000437809	0.0073093
sri-69	3.43258	-5.65651	6.76847	3.43258	3.51613	2.68241	0.000437882	0.0073093
pifk-1	2.75573	-5.26974	6.3817	2.75573	3.51427	2.68241	0.000440961	0.0073093
chd-7	-6.67178	4.30281	-2.17558	-2.17558	-3.51234	-2.68241	0.000444174	0.0073093
Y75B8A.24	2.65904	-5.46312	6.72012	2.65904	3.50985	2.68241	0.00044836	0.0073093
idh-2	3.33589	-5.80155	7.0102	3.33589	3.50697	2.68241	0.000453236	0.0073093
T23B12.11	-4.68958	3.09416	-1.45039	-1.45039	-3.50611	-2.68241	0.000454708	0.0073093
mrps-15	3.28754	-4.88297	6.04328	3.28754	3.50283	2.68241	0.000460347	0.0073093
dhhc-3	3.33589	-5.02801	6.18832	3.33589	3.50228	2.68241	0.000461299	0.0073093
F49C12.9	2.41731	-5.31808	6.81682	2.41731	3.49728	2.68241	0.000470033	0.0073093
spe-48	2.90077	-5.26974	6.67178	2.90077	3.49712	2.68241	0.000470314	0.0073093
sap-49	3.1425	-5.07635	6.47839	3.1425	3.49707	2.68241	0.000470403	0.0073093
M176.4	2.90077	-4.59289	6.18832	2.90077	3.49647	2.68241	0.00047145	0.0073093
msrp-7	3.2392	-5.02801	6.09162	3.2392	3.49139	2.67862	0.000480517	0.00739257
B0035.3	3.72266	-6.28501	7.54201	3.72266	3.48602	2.67479	0.00049027	0.00747756
C06G3.6	3.19085	-5.7532	6.76847	3.19085	3.48425	2.67479	0.000493519	0.00747756
rig-1	3.09416	-5.07635	6.13997	3.09416	3.48021	2.67226	0.000501029	0.00753427
pmk-2	3.19085	-5.1247	6.28501	3.19085	3.47721	2.67102	0.000506666	0.00756218
Y40C5A.4	3.04581	-5.17305	6.23666	3.04581	3.47234	2.66742	0.000515938	0.00764352
mab-23	3.2392	-5.55982	6.57509	3.2392	3.46672	2.66429	0.000526848	0.0077151
spds-1	3.1425	-5.02801	6.18832	3.1425	3.46589	2.66429	0.000528484	0.0077151
T24H7.8	3.1425	-5.26974	6.57509	3.1425	3.46126	2.66095	0.000537645	0.00779196
cct-4	-3.62597	2.36896	-1.06362	-1.06362	-3.45608	-2.6569	0.000548094	0.00788624
fbp-1	2.90077	-5.51147	6.76847	2.90077	3.43729	2.63973	0.000587573	0.00829712
T24H10.4	3.04581	-4.97966	6.18832	3.04581	3.43659	2.63973	0.000589095	0.00829712
rnf-145	2.75573	-5.55982	6.67178	2.75573	3.43447	2.63946	0.00059372	0.00830378
ZK1320.13	3.19085	-4.97966	6.09162	3.19085	3.43045	2.63741	0.000602582	0.00835428
F55F10.1	-9.08909	7.78374	-2.17558	-2.17558	-3.42906	-2.63741	0.000605686	0.00835428
F42A9.18	2.70739	-5.7532	7.0102	2.70739	3.42062	2.63192	0.000624779	0.00849047
R07A4.3	3.1425	-4.97966	6.13997	3.1425	3.42025	2.63192	0.00062563	0.00849047
C03A3.2	2.90077	-5.1247	6.57509	2.90077	3.41649	2.63192	0.000634337	0.00849047
spr-3	2.94912	-5.17305	6.23666	2.94912	3.41629	2.63192	0.000634804	0.00849047
unc-37	-8.50893	3.67431	-2.17558	-2.17558	-3.41402	-2.63192	0.000640113	0.00849047
T21B4.15	-8.65397	7.6387	-1.54708	-1.54708	-3.41363	-2.63192	0.000641031	0.00849047
jmjd-1.2	2.99747	-5.1247	6.28501	2.99747	3.4086	2.62788	0.000652983	0.00859189
arx-4	3.04581	-4.97966	6.43005	3.04581	3.40182	2.62279	0.000669398	0.0087214
Y62E10A.24	2.85243	-5.31808	6.33335	2.85243	3.40094	2.62279	0.000671548	0.0087214
F44E7.4	3.33589	-6.43005	7.44532	3.33589	3.39555	2.61828	0.000684903	0.00883746
dmd-6	3.04581	-4.97966	6.13997	3.04581	3.39186	2.61588	0.000694188	0.00889985
pdcd-2	2.90077	-4.97966	6.09162	2.90077	3.38971	2.61537	0.000699674	0.00891304
lin-65	2.85243	-5.02801	6.33335	2.85243	3.3843	2.61081	0.000713593	0.00903282
ZK353.4	3.04581	-4.68958	6.28501	3.04581	3.3768	2.60575	0.00073334	0.00916746
rpb-9	2.90077	-5.60816	7.15524	2.90077	3.37678	2.60575	0.000733397	0.00916746
sec-12	2.75573	-4.68958	6.13997	2.75573	3.37134	2.6024	0.000748042	0.00925728
C17H11.6	2.85243	-5.84989	6.96186	2.85243	3.37068	2.6024	0.00074984	0.00925728
cyl-1	2.75573	-4.93131	6.47839	2.75573	3.36865	2.60199	0.000755383	0.00926851
Y17D7C.9	2.36896	-5.02801	6.72012	2.36896	3.36131	2.59605	0.000775727	0.00943033
ain-1	3.1425	-5.46312	6.52674	3.1425	3.35872	2.59605	0.000783056	0.00943033
lin-49	2.75573	-4.88297	6.04328	2.75573	3.3586	2.59605	0.000783378	0.00943033
suro-1	2.75573	-5.02801	6.18832	2.75573	3.35485	2.59605	0.000794073	0.00943033
F56A11.4	2.75573	-5.31808	6.43005	2.75573	3.3539	2.59605	0.000796807	0.00943033
spsb-1	-8.55728	2.80408	-1.35369	-1.35369	-3.35225	-2.59605	0.000801578	0.00943033
tofu-1	2.32062	-5.99493	7.10689	2.32062	3.34746	2.59211	0.000815567	0.00953879
tag-273	2.94912	-5.26974	6.33335	2.94912	3.33876	2.58351	0.000841518	0.00978007
gsp-2	2.90077	-5.84989	6.86516	2.90077	3.33564	2.58351	0.000851029	0.00978007
pfd-2	2.41731	-4.93131	7.15524	2.41731	3.33513	2.58351	0.000852604	0.00978007
rpl-30	2.514	-5.26974	6.96186	2.514	3.33332	2.58351	0.000858176	0.00978007
vbh-1	2.41731	-5.89824	6.86516	2.41731	3.33252	2.58351	0.000860646	0.00978007
dli-1	2.75573	-5.7532	6.96186	2.75573	3.32693	2.58038	0.000878071	0.00986911
flp-25	-8.41224	2.80408	-1.45039	-1.45039	-3.32685	-2.58038	0.000878351	0.00986911
R05D11.5	2.65904	-5.60816	6.81682	2.65904	3.32337	2.57943	0.000889356	0.00989634
npr-21	-6.72012	3.96439	-1.83716	-1.83716	-3.32296	-2.57943	0.00089067	0.00989634
linc-29	2.6107	-4.88297	6.23666	2.6107	3.3208	2.57866	0.000897614	0.00991839
F58G1.2	2.70739	-5.02801	6.18832	2.70739	3.31358	2.57489	0.000921109	0.0100271
F32B5.2	2.85243	-5.60816	6.67178	2.85243	3.31273	2.57489	0.000923885	0.0100271
vgln-1	-7.7354	5.22139	-2.46566	-2.46566	-3.31219	-2.57489	0.000925691	0.0100271
eri-1	2.80408	-4.73793	5.99493	2.80408	3.31164	2.57489	0.00092751	0.0100271
mrps-33	2.85243	-6.28501	7.44532	2.85243	3.30997	2.57469	0.000933064	0.0100329
C54G4.5	2.85243	-5.55982	6.57509	2.85243	3.30518	2.57212	0.000949167	0.0101077
bckd-1B	2.85243	-4.93131	6.28501	2.85243	3.30489	2.57212	0.000950123	0.0101077
F16B3.3	2.22393	-4.88297	6.96186	2.22393	3.29884	2.56923	0.000970863	0.0101925
W09C5.7	2.36896	-5.07635	6.67178	2.36896	3.29882	2.56923	0.000970925	0.0101925
flp-27	2.80408	-4.59289	6.04328	2.80408	3.29811	2.56923	0.000973384	0.0101925
fib-1	2.94912	-5.41478	6.67178	2.94912	3.29628	2.56878	0.000979744	0.0102057
T23B5.3	2.514	-5.26974	6.3817	2.514	3.29334	2.56701	0.000990034	0.0102578
D2007.2	2.70739	-4.73793	5.99493	2.70739	3.29077	2.56701	0.00099915	0.0102578
nlp-77	-8.79901	7.49366	-2.32062	-2.32062	-3.28926	-2.56701	0.00100452	0.0102578
ora-1	2.6107	-4.4962	6.86516	2.6107	3.28905	2.56701	0.00100527	0.0102578
C14A11.5	2.70739	-6.86516	7.7354	2.70739	3.28495	2.56489	0.00102001	0.0103209
uaf-1	2.46566	-5.1247	6.28501	2.46566	3.28423	2.56489	0.00102262	0.0103209
C39E9.8	-8.55728	4.64124	-1.35369	-1.35369	-3.28304	-2.56489	0.00102693	0.0103209
T13C2.7	2.70739	-5.07635	6.23666	2.70739	3.27933	2.56206	0.00104055	0.0104055
C30G7.2	2.80408	-5.22139	6.3817	2.80408	3.2764	2.56018	0.00105141	0.0104618
rbm-7	2.56235	-5.02801	6.62343	2.56235	3.27449	2.56006	0.00105852	0.0104653
sftb-2	2.70739	-5.31808	6.47839	2.70739	3.2735	2.56006	0.00106223	0.0104653
rab-10	3.2392	-5.60816	7.15524	3.2392	3.26678	2.55351	0.00108776	0.0106643
tag-340	2.514	-4.39951	5.7532	2.514	3.25934	2.54606	0.00111671	0.0108947
let-526	1.9822	-4.78628	6.33335	1.9822	3.25637	2.5441	0.00112846	0.0109559
F08A8.5	2.6107	-5.26974	6.67178	2.6107	3.25355	2.54232	0.00113972	0.0110118
unc-11	-8.60563	5.31808	-1.35369	-1.35369	-3.25181	-2.54187	0.00114671	0.0110261
C54E10.6	2.36896	-4.15778	7.20359	2.36896	3.24501	2.53518	0.00117448	0.011239
cyb-3	2.514	-4.44785	6.23666	2.514	3.23955	2.53014	0.00119718	0.0114018
M18.6	2.99747	-5.26974	6.33335	2.99747	3.23662	2.5282	0.00120954	0.0114648
dpy-13	2.70739	-5.31808	6.67178	2.70739	3.23135	2.52543	0.00123209	0.0115558
Y80D4G.1	2.90077	-7.15524	8.17051	2.90077	3.22955	2.52543	0.00123983	0.0115558
vps-22	2.46566	-4.97966	6.23666	2.46566	3.22889	2.52543	0.0012427	0.0115558
rnh-1.3	2.36896	-4.01274	6.76847	2.36896	3.22862	2.52543	0.0012439	0.0115558
vpr-1	2.6107	-4.83462	6.13997	2.6107	3.22615	2.52543	0.00125468	0.0115558
Y105E8A.11	-8.8957	7.39697	-1.69212	-1.69212	-3.22506	-2.52543	0.00125944	0.0115558
nmy-1	2.22393	-5.1247	6.47839	2.22393	3.22323	2.52543	0.00126754	0.0115558
C07H6.4	2.12723	-4.88297	7.20359	2.12723	3.22315	2.52543	0.00126788	0.0115558
dhod-1	2.36896	-5.55982	6.81682	2.36896	3.22075	2.52543	0.00127855	0.0115558
ZK546.18	2.36896	-4.25447	5.70485	2.36896	3.21982	2.52543	0.0012827	0.0115558
kbrl-1	2.07889	-4.88297	6.33335	2.07889	3.2145	2.52205	0.00130673	0.0116672
mafr-1	2.27227	-4.39951	5.99493	2.27227	3.20996	2.51806	0.00132754	0.0118004
trpp-6	2.65904	-5.17305	6.62343	2.65904	3.20516	2.51374	0.00134987	0.0119457
col-19	-8.75067	7.44532	-1.83716	-1.83716	-3.20284	-2.51245	0.00136081	0.0119895
B0303.7	2.56235	-4.97966	6.28501	2.56235	3.20005	2.51059	0.00137405	0.012053
dhhc-9	2.22393	-5.94659	7.10689	2.22393	3.19505	2.50665	0.00139805	0.012188
F45F2.9	2.12723	-5.36643	6.67178	2.12723	3.19432	2.50665	0.00140162	0.012188
C37C3.1	1.78881	-4.10943	5.70485	1.78881	3.1905	2.50351	0.00142027	0.0122967
T07D1.3	-3.8677	2.22393	-0.821886	-0.821886	-3.18498	-2.49909	0.00144766	0.0124514
octr-1	2.27227	-4.01274	6.04328	2.27227	3.18439	2.49909	0.00145058	0.0124514
plc-4	2.46566	-4.88297	6.09162	2.46566	3.18163	2.49723	0.00146448	0.0125169
dep-1	-8.3639	7.44532	-1.40204	-1.40204	-3.17968	-2.49635	0.00147437	0.0125478
che-10	-8.75067	7.44532	-1.257	-1.257	-3.1705	-2.48662	0.00152175	0.0128962
Y60A3A.21	2.56235	-4.68958	5.84989	2.56235	3.16906	2.48636	0.00152932	0.0129057
T10H10.2	-4.44785	2.80408	-1.16031	-1.16031	-3.16176	-2.47892	0.0015682	0.0131781
ubr-5	2.56235	-4.93131	6.04328	2.56235	3.16042	2.47878	0.00157542	0.0131834
rsu-1	2.03054	-5.22139	6.72012	2.03054	3.15686	2.4777	0.00159479	0.0132233
Y73B3B.5	-5.17305	3.19085	-1.40204	-1.40204	-3.15579	-2.4777	0.00160066	0.0132233
C04E7.3	2.32062	-4.54454	7.05855	2.32062	3.15459	2.4777	0.00160726	0.0132233
T26A5.8	2.07889	-5.22139	6.47839	2.07889	3.15273	2.4777	0.00161749	0.0132233
cpin-1	2.41731	-4.54454	5.7532	2.41731	3.15249	2.4777	0.00161886	0.0132233
C55A6.10	2.27227	-4.68958	6.18832	2.27227	3.15231	2.4777	0.00161986	0.0132233
cyn-5	2.22393	-5.17305	6.57509	2.22393	3.14881	2.4765	0.00163937	0.0132677
pgam-5	2.03054	-4.68958	6.23666	2.03054	3.14595	2.4765	0.00165549	0.0132677
T07F12.2	2.22393	-5.94659	7.10689	2.22393	3.14569	2.4765	0.00165693	0.0132677
Y76B12C.8	1.78881	-4.10943	6.76847	1.78881	3.14425	2.4765	0.00166513	0.0132677
C18E3.3	2.17558	-4.88297	6.23666	2.17558	3.14409	2.4765	0.00166604	0.0132677
npp-16	2.32062	-4.93131	6.28501	2.32062	3.14334	2.4765	0.00167032	0.0132677
asb-2	2.12723	-5.60816	6.96186	2.12723	3.14309	2.4765	0.00167174	0.0132677
C44H4.8	2.514	-4.73793	5.94659	2.514	3.14067	2.47564	0.00168562	0.0132997
R07E5.19	1.8855	-4.4962	5.99493	1.8855	3.14007	2.47564	0.00168906	0.0132997
R12E2.7	2.80408	-6.04328	7.25193	2.80408	3.13534	2.47127	0.00171657	0.0134633
fkh-7	2.03054	-4.30281	5.99493	2.03054	3.13311	2.46995	0.00172967	0.0135131
Y48G1C.9	2.03054	-4.54454	6.18832	2.03054	3.12554	2.46213	0.00177477	0.0138114
cpd-1	2.56235	-5.17305	6.3817	2.56235	3.12199	2.45919	0.00179632	0.013925
cnnm-3	1.93385	-4.39951	6.23666	1.93385	3.11965	2.45772	0.00181068	0.0139821
K07A1.3	2.80408	-5.89824	7.39697	2.80408	3.11567	2.45433	0.0018353	0.0141148
maea-1	2.41731	-4.73793	6.33335	2.41731	3.11459	2.45433	0.00184198	0.0141148
Y17G7B.22	2.22393	-4.4962	6.13997	2.22393	3.11306	2.45428	0.00185161	0.0141169
eif-3.G	2.22393	-4.59289	5.89824	2.22393	3.11075	2.45428	0.00186615	0.0141169
F55G11.1	1.78881	-4.01274	6.67178	1.78881	3.11047	2.45428	0.00186789	0.0141169
npr-12	2.32062	-4.64124	6.04328	2.32062	3.10999	2.45428	0.00187094	0.0141169
M02B1.2	2.41731	-4.54454	5.84989	2.41731	3.10895	2.45428	0.00187754	0.0141169
cisd-3.2	2.07889	-3.96439	6.09162	2.07889	3.10683	2.45305	0.00189105	0.0141652
lin-33	2.514	-5.26974	6.47839	2.514	3.10486	2.452	0.00190369	0.0142066
D1069.1	2.07889	-5.22139	6.57509	2.07889	3.10238	2.45031	0.00191974	0.0142732
cut-2	2.41731	-4.59289	5.84989	2.41731	3.10015	2.45008	0.0019342	0.0142823
cpt-2	2.27227	-4.4962	5.89824	2.27227	3.0983	2.45008	0.00194635	0.0142823
T04F8.8	-5.94659	2.94912	-1.11196	-1.11196	-3.09811	-2.45008	0.00194762	0.0142823
B0261.1	2.41731	-4.54454	5.80155	2.41731	3.09781	2.45008	0.00194954	0.0142823
F58F9.1	1.8855	-4.88297	6.28501	1.8855	3.09589	2.44906	0.00196225	0.014323
frm-3	2.12723	-5.22139	6.67178	2.12723	3.09309	2.44698	0.00198081	0.0144059
bet-1	-8.46059	7.34863	-1.257	-1.257	-3.09195	-2.4469	0.00198844	0.014409
T01D3.1	2.22393	-5.22139	6.62343	2.22393	3.08986	2.44567	0.00200248	0.0144583
cul-1	2.46566	-4.93131	6.09162	2.46566	3.08465	2.44064	0.00203791	0.0146612
aps-2	2.41731	-5.51147	6.57509	2.41731	3.07824	2.43415	0.0020823	0.0149269
tars-1	2.65904	-5.84989	7.05855	2.65904	3.07646	2.43328	0.00209478	0.0149627
hpo-38	2.03054	-5.07635	6.43005	2.03054	3.07371	2.43124	0.00211416	0.0150474
F14D7.1	1.74046	-4.44785	6.33335	1.74046	3.07144	2.43106	0.00213026	0.0150549
R151.2	2.12723	-5.55982	7.20359	2.12723	3.06815	2.42833	0.00215391	0.0151683
T05A8.3	0.966924	-4.68958	7.44532	0.966924	3.06587	2.42685	0.00217036	0.0152306
rgs-2	1.78881	-4.4962	6.81682	1.78881	3.05784	2.41838	0.00222935	0.0155899
allo-1	1.9822	-4.15778	5.80155	1.9822	3.05625	2.41771	0.00224126	0.0156185
T09F5.12	-7.49366	3.48093	-1.01527	-1.01527	-3.05285	-2.41486	0.00226677	0.0157415
col-161	-6.52674	2.99747	-1.01527	-1.01527	-3.05042	-2.41316	0.00228525	0.0158149
lex-1	2.03054	-3.96439	5.7532	2.03054	3.04937	2.41315	0.00229325	0.0158155
C14E2.12	2.41731	-7.30028	8.21886	2.41731	3.0439	2.40776	0.00233536	0.0160506
cyn-6	2.41731	-4.54454	6.04328	2.41731	3.04214	2.40689	0.00234903	0.0160892
H03E18.2	1.83716	-4.01274	5.89824	1.83716	3.03715	2.40208	0.00238827	0.0163022
ift-43	1.9822	-4.54454	6.33335	1.9822	3.03563	2.40148	0.00240037	0.016329
T02B11.3	-8.3639	2.80408	-1.01527	-1.01527	-3.03366	-2.40033	0.00241609	0.0163803
gpd-2	-4.35116	2.6107	-1.01527	-1.01527	-3.02837	-2.39515	0.00245879	0.0166135
D1007.15	1.78881	-4.78628	6.67178	1.78881	3.02439	2.39401	0.00249134	0.0166653
C03A3.1	2.17558	-5.70485	6.96186	2.17558	3.02438	2.39401	0.00249146	0.0166653
mec-5	-8.31555	4.39951	-1.257	-1.257	-3.02111	-2.39127	0.00251853	0.0167902
C26B2.2	1.74046	-3.91604	5.89824	1.74046	3.01852	2.38966	0.0025401	0.0168642
nuo-4	2.27227	-5.17305	6.91351	2.27227	3.01712	2.38966	0.00255188	0.0168642
C07D8.6	1.8855	-3.52927	5.89824	1.8855	3.01676	2.38966	0.00255492	0.0168642
bbs-5	2.07889	-5.07635	6.47839	2.07889	3.01016	2.38287	0.0026111	0.0171783
gop-2	2.03054	-3.91604	5.46312	2.03054	3.00842	2.38197	0.00262606	0.0172201
bed-2	-8.2672	4.25447	-0.966924	-0.966924	-3.00707	-2.38154	0.00263777	0.0172403
Y59C2A.3	2.07889	-4.88297	6.33335	2.07889	3.0007	2.37502	0.00269363	0.0175481
C48B6.2	2.03054	-4.97966	6.47839	2.03054	2.99961	2.3749	0.00270327	0.0175537
F30H5.4	2.12723	-5.17305	6.86516	2.12723	2.99575	2.37173	0.00273773	0.0177048
lact-1	-7.39697	2.85243	-0.966924	-0.966924	-2.99488	-2.37173	0.00274554	0.0177048
col-124	-8.07382	6.09162	-2.56235	-2.56235	-2.99404	-2.37173	0.0027531	0.0177048
lsm-1	2.03054	-3.52927	5.70485	2.03054	2.99258	2.37141	0.00276633	0.0177203
F23F1.10	1.9822	-3.57762	5.70485	1.9822	2.98962	2.37141	0.00279328	0.0177203
cct-5	-3.52927	2.07889	-0.725193	-0.725193	-2.98826	-2.37141	0.00280566	0.0177203
pbs-7	2.12723	-5.22139	6.96186	2.12723	2.98814	2.37141	0.00280677	0.0177203
num-1	2.03054	-5.22139	6.52674	2.03054	2.98784	2.37141	0.00280956	0.0177203
Y48G10A.6	2.27227	-4.4962	5.7532	2.27227	2.98719	2.37141	0.00281557	0.0177203
Y66D12A.10	1.78881	-5.07635	6.96186	1.78881	2.98698	2.37141	0.00281752	0.0177203
perm-3	2.12723	-4.83462	6.3817	2.12723	2.98527	2.3714	0.00283328	0.017721
cdk-8	1.8855	-3.48093	5.60816	1.8855	2.98505	2.3714	0.00283536	0.017721
gas-1	2.22393	-4.64124	6.09162	2.22393	2.98352	2.3707	0.00284956	0.0177543
T02E9.5	1.69212	-4.64124	6.04328	1.69212	2.98152	2.36944	0.00286823	0.0178151
ctns-1	1.83716	-3.91604	6.09162	1.83716	2.98042	2.36927	0.00287849	0.0178235
rsd-6	2.07889	-4.64124	6.62343	2.07889	2.97612	2.36521	0.00291923	0.01802
C35D10.5	1.35369	-4.30281	6.09162	1.35369	2.97342	2.36406	0.00294503	0.0180758
rps-19	-3.72266	2.27227	-0.870232	-0.870232	-2.97263	-2.36406	0.00295256	0.0180758
flp-14	1.40204	-4.97966	7.10689	1.40204	2.97234	2.36406	0.00295539	0.0180758
mig-15	1.59543	-4.30281	6.72012	1.59543	2.97062	2.36312	0.00297201	0.018122
C43H6.4	1.93385	-4.59289	6.13997	1.93385	2.96886	2.36212	0.00298907	0.0181706
kel-3	-8.8957	7.78374	-0.821886	-0.821886	-2.95994	-2.35248	0.00307702	0.0186486
Y94H6A.3	-8.50893	2.07889	-0.918578	-0.918578	-2.95884	-2.35228	0.00308801	0.0186587
F28F8.9	1.74046	-4.68958	5.80155	1.74046	2.95448	2.34924	0.003132	0.0188119
ruvb-1	1.93385	-4.78628	6.76847	1.93385	2.95407	2.34924	0.0031361	0.0188119
cct-1	-3.8677	2.07889	-0.676847	-0.676847	-2.95353	-2.34924	0.00314159	0.0188119
eef-1A.2	-5.1247	3.09416	-1.30535	-1.30535	-2.94735	-2.34289	0.00320509	0.0191349
glod-4	1.40204	-4.01274	5.80155	1.40204	2.94535	2.34159	0.00322586	0.0192016
mat-1	1.83716	-5.55982	6.91351	1.83716	2.93898	2.33501	0.00329297	0.0195429
micu-1	2.56235	-5.60816	7.25193	2.56235	2.93746	2.33445	0.00330911	0.0195721
H40L08.1	1.59543	-5.51147	6.67178	1.59543	2.93668	2.33445	0.00331748	0.0195721
lsl-1	-4.35116	2.32062	-0.918578	-0.918578	-2.93497	-2.33349	0.00333581	0.0196224
F58B4.2	1.93385	-4.97966	6.47839	1.93385	2.93196	2.33214	0.00336827	0.0196931
sna-1	2.22393	-5.99493	7.39697	2.22393	2.93165	2.33214	0.00337164	0.0196931
F10A3.12	1.49873	-4.01274	5.60816	1.49873	2.93077	2.33214	0.00338122	0.0196931
swsn-6	1.93385	-5.1247	6.33335	1.93385	2.93022	2.33214	0.00338722	0.0196931
F33D4.4	1.59543	-5.51147	6.57509	1.59543	2.92349	2.32512	0.00346135	0.0200658
lsy-13	-5.02801	2.41731	-0.918578	-0.918578	-2.92148	-2.32474	0.00348375	0.0200861
mrpl-16	1.35369	-3.96439	5.70485	1.35369	2.92101	2.32474	0.00348896	0.0200861
ZK673.2	1.64377	-4.78628	6.09162	1.64377	2.91808	2.32474	0.00352197	0.0200861
acc-4	1.45039	-4.01274	5.99493	1.45039	2.91788	2.32474	0.00352426	0.0200861
ddb-1	1.01527	-4.93131	6.3817	1.01527	2.9178	2.32474	0.0035251	0.0200861
col-93	-8.84736	6.43005	-3.52927	-3.52927	-2.91474	-2.32213	0.00355981	0.0202262
W08F4.3	1.9822	-4.68958	6.18832	1.9822	2.91039	2.31794	0.00360984	0.0204523
Y23H5B.5	1.257	-3.91604	5.55982	1.257	2.90712	2.31508	0.00364768	0.0206084
Y71G12B.10	-8.02547	3.52927	-0.966924	-0.966924	-2.90485	-2.31425	0.00367427	0.0206543
Y39A1A.3	1.83716	-6.28501	7.10689	1.83716	2.90435	2.31425	0.00368019	0.0206543
bckd-1A	1.83716	-4.78628	6.33335	1.83716	2.90379	2.31425	0.00368679	0.0206543
col-39	-5.94659	2.85243	-0.821886	-0.821886	-2.90182	-2.31294	0.00370998	0.0207261
rund-1	1.83716	-5.02801	6.33335	1.83716	2.90082	2.31278	0.00372191	0.0207349
ufd-3	1.59543	-3.8677	5.31808	1.59543	2.89952	2.31227	0.00373731	0.0207628
K08D12.6	-8.55728	7.54201	-1.16031	-1.16031	-2.8959	-2.30896	0.00378076	0.020946
fbxa-170	-7.97713	6.76847	-0.870232	-0.870232	-2.88965	-2.30355	0.00385672	0.0212478
pen-2	1.59543	-5.1247	6.67178	1.59543	2.8888	2.30355	0.00386709	0.0212478
K11H12.7	-4.88297	3.28754	-1.64377	-1.64377	-2.8868	-2.30288	0.00389184	0.0212856
dpy-4	1.49873	-3.91604	6.43005	1.49873	2.88652	2.30288	0.00389526	0.0212856
R11D1.1	1.78881	-4.64124	5.94659	1.78881	2.87766	2.29326	0.00400634	0.0218329
sid-3	1.9822	-4.39951	5.80155	1.9822	2.87589	2.29216	0.00402896	0.0218965
hyls-1	1.64377	-4.54454	5.89824	1.64377	2.87367	2.29128	0.00405736	0.021947
nlp-52	1.8855	-6.04328	7.34863	1.8855	2.87345	2.29128	0.0040602	0.021947
sqt-1	1.49873	-3.91604	5.94659	1.49873	2.87012	2.2886	0.00410316	0.0221028
eef-1B.2	1.83716	-4.73793	6.09162	1.83716	2.86951	2.2886	0.00411112	0.0221028
cus-2	1.257	-3.91604	5.84989	1.257	2.86703	2.2872	0.00414348	0.0221839
snx-1	1.30535	-3.96439	5.55982	1.30535	2.86665	2.2872	0.00414839	0.0221839
T25G3.1	1.30535	-3.91604	6.33335	1.30535	2.86556	2.28691	0.00416272	0.0222012
cir-1	1.83716	-4.35116	5.80155	1.83716	2.86125	2.28275	0.00421969	0.0224452
R04E5.8	1.83716	-4.68958	6.72012	1.83716	2.85662	2.27819	0.00428185	0.0227154
T04H1.5	1.257	-3.96439	5.65651	1.257	2.85308	2.27495	0.00432973	0.0229087
lea-1	-3.81935	2.27227	-0.725193	-0.725193	-2.85147	-2.27402	0.00435178	0.0229646
arl-8	1.64377	-4.78628	7.05855	1.64377	2.84452	2.26768	0.00444788	0.0233485
K07A1.10	1.54708	-4.64124	6.18832	1.54708	2.84338	2.26732	0.00446384	0.0233709
K07F5.16	1.30535	-4.15778	5.80155	1.30535	2.83942	2.26357	0.00451955	0.0236008
lin-23	1.74046	-5.07635	6.28501	1.74046	2.83802	2.26288	0.00453949	0.0236432
K03B4.4	1.49873	-5.89824	7.10689	1.49873	2.83704	2.2627	0.00455341	0.0236541
C18A11.1	1.35369	-3.57762	5.7532	1.35369	2.83085	2.25626	0.00464244	0.0240541
msa-1	1.54708	-6.67178	7.39697	1.54708	2.82925	2.25533	0.00466573	0.0241123
B0205.1	-7.6387	3.57762	-0.725193	-0.725193	-2.82363	-2.24958	0.00474826	0.0244756
zig-2	1.64377	-3.38424	5.26974	1.64377	2.82247	2.24918	0.00476551	0.0245013
enu-3.5	1.9822	-5.65651	6.81682	1.9822	2.81995	2.24785	0.00480311	0.0245857
dnj-18	1.69212	-5.7532	7.39697	1.69212	2.81949	2.24785	0.00481001	0.0245857
hip-1	-8.75067	7.68705	-0.966924	-0.966924	-2.81833	-2.24785	0.00482739	0.0245857
dma-1	-7.39697	2.514	-0.77354	-0.77354	-2.81809	-2.24785	0.00483108	0.0245857
AH9.3	-9.13744	7.92878	-0.77354	-0.77354	-2.81595	-2.24626	0.00486339	0.0246873
snpc-4	1.93385	-3.52927	5.84989	1.93385	2.81265	2.24328	0.00491351	0.0248785
natc-1	1.40204	-4.35116	6.91351	1.40204	2.81073	2.24293	0.00494295	0.0249015
gars-1	1.64377	-4.68958	6.04328	1.64377	2.80977	2.24275	0.00495769	0.024913
smg-4	-7.0102	2.65904	-0.676847	-0.676847	-2.80671	-2.24005	0.00500496	0.0250875
F59F4.3	1.45039	-3.43258	5.46312	1.45039	2.80284	2.23637	0.00506547	0.0253273
D1081.6	-7.39697	2.03054	-0.77354	-0.77354	-2.80045	-2.23447	0.00510312	0.025452
F45F2.10	1.20866	-3.77101	6.33335	1.20866	2.79643	2.23061	0.00516707	0.0257068
dig-1	-4.10943	2.27227	-0.725193	-0.725193	-2.79454	-2.22931	0.00519737	0.0257934
F20D1.1	-8.50893	7.25193	-0.676847	-0.676847	-2.78557	-2.22028	0.00534331	0.0263996
pbo-1	1.64377	-5.02801	6.33335	1.64377	2.78542	2.22028	0.00534593	0.0263996
feh-1	-5.02801	2.99747	-1.30535	-1.30535	-2.78031	-2.21511	0.00543075	0.0267524
sor-1	1.35369	-5.31808	6.52674	1.35369	2.77861	2.21404	0.00545917	0.0268264
spat-3	2.03054	-5.55982	6.76847	2.03054	2.77726	2.21403	0.00548189	0.0268269
C35B1.2	-7.05855	4.59289	-2.22393	-2.22393	-2.77701	-2.21403	0.00548609	0.0268269
F31E3.2	1.59543	-5.02801	6.09162	1.59543	2.76542	2.20297	0.00568494	0.0275968
R107.5	1.69212	-4.97966	7.15524	1.69212	2.75874	2.19685	0.00580247	0.0280312
R166.2	1.30535	-4.44785	5.99493	1.30535	2.75296	2.19085	0.00590597	0.0284625
F20D12.2	1.64377	-5.41478	6.67178	1.64377	2.75014	2.18913	0.00595706	0.0285871
catp-7	1.49873	-4.35116	5.99493	1.49873	2.74995	2.18913	0.00596041	0.0285871
ceh-18	-4.01274	2.27227	-0.725193	-0.725193	-2.74697	-2.18727	0.00601486	0.0287231
T01G1.4	-7.7354	2.03054	-0.676847	-0.676847	-2.74683	-2.18727	0.00601749	0.0287231
mel-28	1.49873	-4.15778	5.70485	1.49873	2.74558	2.18671	0.00604033	0.0287635
T23G11.7	-8.70232	7.7354	-0.628501	-0.628501	-2.74377	-2.18598	0.00607375	0.028817
gdi-1	-4.35116	2.6107	-0.725193	-0.725193	-2.74316	-2.18598	0.00608504	0.028817
C35D10.17	1.49873	-4.59289	6.13997	1.49873	2.74264	2.18598	0.0060948	0.028817
smk-1	1.45039	-4.20612	5.55982	1.45039	2.74127	2.18527	0.00612031	0.0288694
K08D12.3	-5.55982	3.52927	-1.35369	-1.35369	-2.73845	-2.18281	0.00617304	0.0290496
C33D9.3	-6.86516	4.39951	-1.9822	-1.9822	-2.73355	-2.17849	0.00626553	0.0293693
Y34B4A.7	1.64377	-4.73793	6.28501	1.64377	2.7333	2.17849	0.00627034	0.0293693
F22D6.9	1.35369	-4.15778	6.28501	1.35369	2.73037	2.17591	0.0063263	0.0295621
Y105E8B.7	1.69212	-6.09162	7.7354	1.69212	2.72427	2.16963	0.00644434	0.0300348
rde-11	1.20866	-3.38424	5.31808	1.20866	2.72074	2.16712	0.00651368	0.0302259
col-140	-8.79901	7.44532	-1.78881	-1.78881	-2.71854	-2.16541	0.00655699	0.0303564
F33H1.4	1.54708	-4.88297	6.23666	1.54708	2.70711	2.15353	0.00678718	0.0312773
dgk-4	1.20866	-4.4962	6.04328	1.20866	2.69603	2.14528	0.00701714	0.0319305
F48C1.5	-4.15778	2.12723	-0.628501	-0.628501	-2.69551	-2.14528	0.00702806	0.0319305
lec-2	1.49873	-4.93131	6.09162	1.49873	2.69549	2.14528	0.00702853	0.0319305
gtf-2H1	1.35369	-4.39951	5.80155	1.35369	2.6953	2.14528	0.00703244	0.0319305
unc-13	-4.54454	2.70739	-0.966924	-0.966924	-2.69421	-2.14528	0.00705548	0.0319305
arx-6	-6.23666	2.07889	-0.580155	-0.580155	-2.69416	-2.14528	0.00705664	0.0319305
col-91	-6.72012	2.65904	-0.918578	-0.918578	-2.69317	-2.14499	0.00707767	0.0319534
C36A4.4	-5.55982	2.36896	-0.580155	-0.580155	-2.6876	-2.13922	0.00719672	0.0324176
R07E4.3	1.49873	-4.68958	5.89824	1.49873	2.68575	2.1379	0.00723675	0.0325247
piga-1	1.257	-4.59289	6.18832	1.257	2.6805	2.13321	0.00735124	0.0329072
C26E6.12	1.35369	-4.06108	5.51147	1.35369	2.68034	2.13321	0.00735476	0.0329072
F39H11.1	-4.97966	2.22393	-0.580155	-0.580155	-2.67751	-2.13072	0.0074172	0.0331125
Y37E11B.1	1.74046	-5.46312	6.72012	1.74046	2.67637	2.13025	0.00744239	0.033151
col-117	-6.86516	2.17558	-0.580155	-0.580155	-2.67337	-2.12754	0.00750934	0.0333749
F47B8.3	1.01527	-3.48093	5.99493	1.01527	2.66729	2.12114	0.00764667	0.0339098
Y82E9BR.1	1.49873	-4.35116	6.18832	1.49873	2.66326	2.11721	0.00773875	0.0342423
rpb-5	-8.41224	2.03054	-0.483462	-0.483462	-2.65778	-2.11242	0.00786567	0.0346505
cbd-1	1.45039	-5.80155	7.05855	1.45039	2.65642	2.11167	0.00789754	0.0347145
mif-1	1.40204	-5.36643	6.52674	1.40204	2.65489	2.11073	0.00793346	0.0347959
F13B9.1	1.35369	-4.64124	6.13997	1.35369	2.65296	2.1093	0.00797894	0.0349188
nhr-239	-7.34863	2.94912	-0.531808	-0.531808	-2.65126	-2.10814	0.00801925	0.0350186
ska-3	-5.41478	2.32062	-0.531808	-0.531808	-2.64962	-2.10707	0.00805812	0.0351117
mdt-9	1.59543	-5.41478	6.62343	1.59543	2.64807	2.10608	0.00809531	0.035197
F27D9.2	1.30535	-4.54454	5.99493	1.30535	2.64171	2.09934	0.00824897	0.0357873
Y6B3B.4	1.20866	-3.48093	5.84989	1.20866	2.63658	2.09407	0.00837456	0.0362535
Y97E10C.1	-3.77101	2.07889	-0.531808	-0.531808	-2.63555	-2.09371	0.0084001	0.0362855
cox-6B	-4.10943	2.27227	-0.580155	-0.580155	-2.63186	-2.09016	0.0084919	0.036603
nsun-4	1.257	-3.62597	5.65651	1.257	2.63019	2.08904	0.0085338	0.0367045
kcc-2	1.16031	-3.81935	5.60816	1.16031	2.62657	2.08558	0.00862492	0.0370168
Y43F8C.11	1.16031	-5.80155	7.15524	1.16031	2.62094	2.0797	0.0087687	0.0375533
col-139	-7.6387	5.46312	-1.93385	-1.93385	-2.6196	-2.07896	0.00880329	0.0376209
crt-1	-4.93131	3.09416	-1.20866	-1.20866	-2.6176	-2.07744	0.00885496	0.037761
pqn-51	1.49873	-5.02801	6.96186	1.49873	2.61298	2.07276	0.00897572	0.0381946
col-146	-7.78374	4.39951	-1.01527	-1.01527	-2.61206	-2.07253	0.0089998	0.0382157
ykt-6	1.16031	-4.25447	5.89824	1.16031	2.61105	2.07219	0.00902642	0.0382475
alx-1	1.30535	-5.60816	6.47839	1.30535	2.60624	2.0676	0.00915428	0.0386773
Y54G2A.11	-7.97713	4.15778	-0.435116	-0.435116	-2.60578	-2.0676	0.00916651	0.0386773
Y32B12B.4	1.40204	-4.83462	6.28501	1.40204	2.60183	2.06373	0.00927273	0.0390431
svop-1	1.11196	-5.1247	6.72012	1.11196	2.59626	2.05791	0.00942444	0.0395985
C34H4.5	-5.36643	2.27227	-0.435116	-0.435116	-2.59511	-2.0574	0.00945608	0.0396481
ntl-9	1.35369	-6.13997	7.25193	1.35369	2.59271	2.05538	0.00952238	0.0398426
toca-1	1.11196	-3.96439	5.46312	1.11196	2.59128	2.05453	0.00956185	0.0399242
col-147	-5.60816	2.17558	-0.435116	-0.435116	-2.58674	-2.04993	0.009689	0.0403708
nhr-46	-6.09162	2.36896	-0.435116	-0.435116	-2.58331	-2.04668	0.00978572	0.040689
fbxa-3	1.16031	-3.96439	5.51147	1.16031	2.58221	2.04622	0.00981706	0.0407347
lido-8	-9.13744	7.83209	-2.65904	-2.65904	-2.56936	-2.03181	0.0101888	0.042173
pqn-92	1.11196	-4.35116	5.84989	1.11196	2.56878	2.03181	0.0102059	0.042173
riok-1	1.257	-5.41478	6.52674	1.257	2.56802	2.03176	0.0102282	0.0421783
bre-1	1.06362	-3.81935	5.31808	1.06362	2.56685	2.03122	0.0102627	0.0422332
rpb-11	1.257	-5.22139	6.3817	1.257	2.56494	2.02978	0.0103193	0.0423791
C18B2.4	1.16031	-4.73793	6.13997	1.16031	2.5634	2.02878	0.0103652	0.0424803
Y48G10A.9	-8.50893	4.97966	-0.435116	-0.435116	-2.56205	-2.02802	0.0104056	0.0425585
bath-2	1.20866	-3.38424	5.26974	1.20866	2.55778	2.02373	0.0105344	0.0429975
cpi-2	-3.72266	2.03054	-0.531808	-0.531808	-2.55681	-2.02343	0.0105636	0.043029
C35C5.10	0.966924	-3.33589	6.13997	0.966924	2.553	2.0197	0.0106799	0.0434144
F23A7.8	0.821886	-3.1425	5.31808	0.821886	2.55168	2.01897	0.0107204	0.0434906
rab-14	1.01527	-4.35116	5.70485	1.01527	2.54868	2.01621	0.0108131	0.0437777
M60.4	-8.21886	7.20359	-0.38677	-0.38677	-2.54426	-2.01225	0.0109509	0.0441937
lfi-1	-5.46312	3.2392	-1.35369	-1.35369	-2.54397	-2.01225	0.01096	0.0441937
map-1	1.11196	-5.22139	6.3817	1.11196	2.54312	2.01208	0.0109866	0.0442116
cec-4	1.01527	-3.91604	5.51147	1.01527	2.54242	2.01208	0.0110088	0.0442119
hrg-1	0.870232	-3.48093	5.41478	0.870232	2.53112	2.00019	0.01137	0.04548
bkip-1	1.45039	-5.02801	6.67178	1.45039	2.52863	1.99804	0.0114508	0.045712
shc-1	1.35369	-4.54454	6.09162	1.35369	2.51794	1.98603	0.0118045	0.0470299
ttr-6	-8.02547	4.44785	-0.38677	-0.38677	-2.5159	-1.9847	0.0118727	0.0471778
hsp-70	1.49873	-4.59289	6.09162	1.49873	2.51457	1.9847	0.0119176	0.0471778
F11E6.3	-7.44532	3.28754	-0.38677	-0.38677	-2.51403	-1.9847	0.011936	0.0471778
cid-1	1.06362	-4.30281	5.7532	1.06362	2.50714	1.97809	0.0121713	0.0479187
icl-1	-6.13997	3.04581	-0.338424	-0.338424	-2.50428	-1.97629	0.0122701	0.048122
syp-2	1.16031	-5.89824	6.96186	1.16031	2.50425	1.97629	0.0122711	0.048122
M03F8.3	-8.70232	7.7354	-0.338424	-0.338424	-2.50272	-1.97528	0.0123245	0.0482366
pdr-1	1.01527	-3.96439	5.7532	1.01527	2.49003	1.96086	0.0127733	0.0498957
pdf-1	-7.83166	4.59264	-2.6589	-2.6589	-4.26454	-2.98598	2.00311e-05	0.0028267
cdc-48.1	3.72246	-6.09129	7.29988	3.72246	3.68628	2.70473	0.000227557	0.00683593
brap-2	2.6589	-6.09129	7.15485	2.6589	3.57045	2.67446	0.000356371	0.00748499
sma-1	-9.13694	8.21841	-1.59534	-1.59534	-3.51409	-2.64759	0.00044126	0.00810679
egl-27	3.04565	-5.22111	6.71976	3.04565	3.46061	2.62186	0.000538944	0.00874506
tag-68	2.6589	-5.99461	7.25154	2.6589	3.31649	2.55713	0.000911546	0.010554
kgb-1	2.9973	-5.12442	6.38135	2.9973	3.29437	2.54384	0.000986437	0.0109642
prmt-5	1.83706	-4.10921	6.04295	1.83706	3.12252	2.43409	0.00179311	0.0149292
rpy-1	2.03043	-3.38405	5.84958	2.03043	3.04106	2.3801	0.00235747	0.017308
fli-1	1.69203	-3.38405	5.75289	1.69203	2.95028	2.31456	0.0031749	0.0206368
wdr-23	1.98209	-5.22111	6.52639	1.98209	2.91312	2.28451	0.00357837	0.0223418
ptps-1	1.547	-3.33571	5.80123	1.547	2.9128	2.28451	0.00358208	0.0223418
unc-44	-3.91583	2.27215	-0.725154	-0.725154	-2.90244	-2.27991	0.00370272	0.022613
lin-42	1.40196	-4.15755	6.13964	1.40196	2.88554	2.2656	0.0039074	0.0234761
cnx-1	1.98209	-4.93105	6.33301	1.98209	2.8085	2.21076	0.00497731	0.0270527
par-1	1.78871	-5.26945	6.62307	1.78871	2.78193	2.18711	0.00540366	0.0287347
dab-1	1.30528	-3.23902	4.83436	1.30528	2.73645	2.14909	0.00621063	0.0316273
pmk-3	-8.07338	3.48074	-0.580123	-0.580123	-2.70499	-2.11802	0.00683061	0.0341737
ekl-1	0.725154	-3.52908	5.36614	0.725154	2.70375	2.11802	0.00685626	0.0341737
cyy-1	0.725154	-4.25424	5.84958	0.725154	2.67192	2.09279	0.0075418	0.0363675
cpna-4	-5.12442	3.09399	-1.20859	-1.20859	-2.54482	-1.97115	0.0109334	0.0487071
mle: log2 fold expression difference value, reported as maximum likelihood estimate lb, ub: 95% lower bound (lb) and upper bound (ub) of the log2 fold expression difference value ce: conservative estiamte of the log2 fold expression difference Z: statistical significance of the expression differences, expressed as a signed Z score cZ: Z score adjusted for multiple hypothesis testing p.values: P v…
